# Supplementary material for: Mechanistic insights into radical formation and functionalization in copper/N-fluorobenzenesulfonimide radical-relay reactions
Source: Royal Society of Chemistry journal article supplement (doi:10.1039/d3sc03597b), 2023-12-12
Supplement: d3sc03597b1.pdf [file d3sc03597b1.pdf]

## Supporting Information

### Mechanistic Insights into Radical Formation and Functionalization in Copper/*N*-Fluorobenzenesulfonimide Radical-Relay Reactions

Mukunda Mandal,<sup>1,2†\*</sup> Joshua A. Buss,<sup>3,4†</sup> Si-Jie Chen,<sup>3,5</sup> Christopher J. Cramer,<sup>1,6</sup> and  
Shannon S. Stahl<sup>3\*</sup>

<sup>1</sup>Department of Chemistry, Chemical Theory Center, and Supercomputing Institute, University of Minnesota, 207 Pleasant Street SE, Minneapolis, MN 55455, United States

<sup>2</sup>Max Planck Institute for Polymer Research, Ackermannweg 10, 55128 Mainz, Germany

<sup>3</sup>Department of Chemistry, University of Wisconsin-Madison, 1101 University Avenue, Madison, WI 53706, United States

<sup>4</sup>Current address: Department of Chemistry, University of Michigan, Ann Arbor, MI 48109, United States

<sup>5</sup>Current address: Department of Discovery Chemistry, Merck & Co. Inc., South San Francisco, CA 93080, United States

<sup>6</sup>Current address: Underwriters Laboratories Inc., 333 Pfingsten Road, Northbrook, IL 60602, United States

†These authors contributed equally to this work.

\*Email: mukunda.chem@gmail.com, stahl@chem.wisc.edu

## Table of Contents

|      |                                                                                                |     |
|------|------------------------------------------------------------------------------------------------|-----|
| 1.   | Experimental selectivity studies .....                                                         | S3  |
| 2.   | Crystallographic data.....                                                                     | S5  |
| 2.1. | Crystal growth .....                                                                           | S5  |
| 2.2. | Data collection.....                                                                           | S5  |
| 2.3. | Structure solution and refinement .....                                                        | S6  |
| 2.4. | Summary.....                                                                                   | S7  |
| 3.   | “Correction” to calculated Gibbs free energy due to standard-state concentration changes ..... | S9  |
| 4.   | Cartesian coordinates of DFT computed structures .....                                         | S9  |
| 5.   | Structures of ‘small’ species involved in the study and their energetics .....                 | S9  |
| 6.   | All ligand exchange energetics .....                                                           | S13 |
| 7.   | Favored reduced state of various $LCu^{II}$ species.....                                       | S13 |
| 8.   | Resting state of the $\bullet NSI$ radical.....                                                | S16 |
| 9.   | Spin density plots and relative energies of all Cu/NSI species explored .....                  | S17 |
| 10.  | Hydrogen-atom transfer (HAT) vs. proton-coupled electron transfer (PCET).....                  | S18 |
| 11.  | Computed bond dissociation enthalpies (BDEs) .....                                             | S22 |
| 12.  | Regioselectivity studies .....                                                                 | S22 |
| 13.  | Steric maps for comparing reactivity at aliphatic vs. benzylic C–H bonds.....                  | S23 |
| 14.  | Energetics for product forming pathways: Cyanation vs. azidation vs. etherification .....      | S23 |
| 15.  | Comparing Cu/NFSI reactivity with analogous methods yielding benzylic cation.....              | S26 |
| 16.  | References.....                                                                                | S29 |

## 1. Experimental selectivity studies

The data for the isobutylbenzene and isopentylbenzene test substrates has been published elsewhere in earlier reports of benzylic etherification<sup>1</sup> and chlorination.<sup>2</sup> Representative procedures for 4-ethyltoluene are included here.

**Etherification:** A 4 mL septa-capped glass vial was charged with CuCl (10 mol %, 0.02 mmol, 2.0 mg), 2, 2'-bisoxazoline (10 mol %, 0.02 mmol, 2.8 mg) and NFSI (2.0 equiv., 0.4 mmol, 126.1 mg) and a stir bar. The vial was sealed and the headspace sparged with dinitrogen for 30 seconds. A stock solution of alkylbenzene (1.0 equiv., 0.2 mmol), MeOH (5.0 equiv., 1.0 mmol, 40.5  $\mu$ L) and diisopropyl phosphite (0.5 equiv., 0.1 mmol, 16.7  $\mu$ L) in CH<sub>2</sub>Cl<sub>2</sub>:HFIP = 4:1 (0.2 M, 1.0 mL) was injected through the septum cap. The reaction mixture was heated at 40 °C and stirred for 16 hours.

At this time, the reaction was filtered through a silica plug (*ca.* 3" in a 9" Pasteur pipette). The vial was rinsed with an additional CH<sub>2</sub>Cl<sub>2</sub> (3 mL), which was passed through the plug and mesitylene (28  $\mu$ L, 0.2 mmol, 1.0 equiv.) was added into the combined filtrates. An aliquot of the filtrates was taken up in CDCl<sub>3</sub> (*ca.* 1 mL) and a 400  $\mu$ L aliquot was transferred to an NMR tube for analysis.

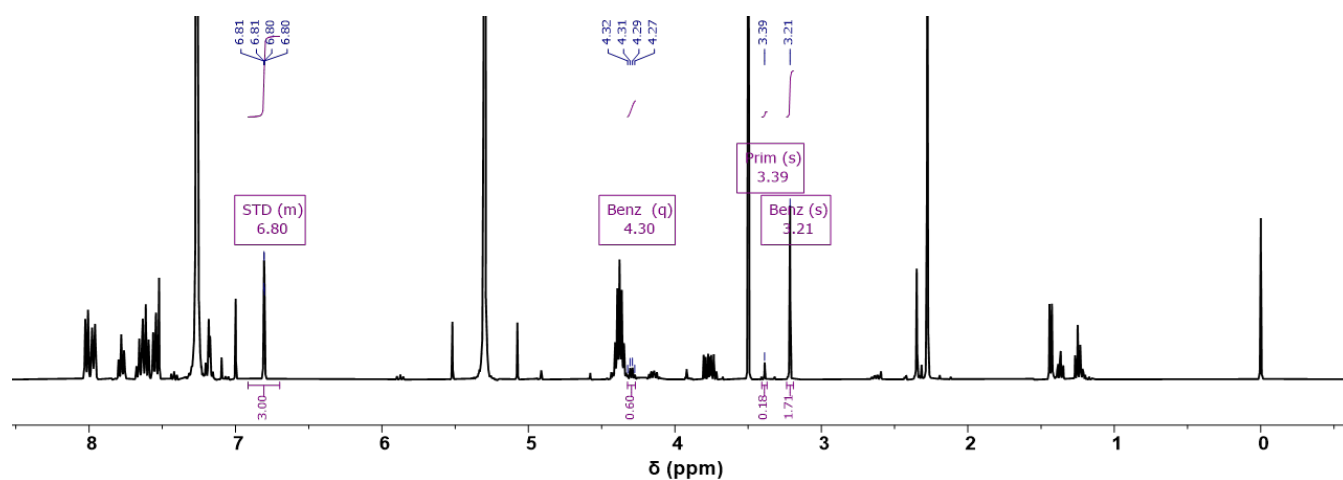

**Figure S1.** <sup>1</sup>H NMR Spectrum (400 MHz, 24 °C, CDCl<sub>3</sub>) of a representative Cu/NFSI methoxylation of 4-ethyltoluene (crude). The diagnostic peaks for 2° benzylic (Benz–5.07 ppm), 1° benzylic (Prim–2.70 ppm), dichlorination (1°/2° Cl<sub>2</sub>–5.02 ppm), and unreacted starting material (SM–2.60 ppm) are labeled accordingly.

**Ag/<sup>t</sup>BuOCl:** A 4 mL septa-capped scintillation vial was charged with 4-ethyltoluene (145  $\mu$ L, 1.0 mmol, 1 equiv.) and a stir bar. The vial was sealed and the headspace sparged with dinitrogen for 30 seconds. A stock solution of Ag(phen)OTf in anhydrous MeCN (400  $\mu$ L, 5.5 mM, 0.002 equiv.) was injected through the septum cap.<sup>3</sup> Neat <sup>t</sup>BuOCl (225  $\mu$ L, 2.0  $\mu$ mol, 2.0 equiv.) was then injected and the reaction mixture left to stir for 48 hours.

At this time, the reaction was diluted with EtOAc (0.5 mL) and filtered through a silica plug (*ca.* 3" in a 9" Pasteur pipette). The vial was rinsed with an additional portion of EtOAc (0.5 mL) which was likewise passed through the plug. The combined filtrates were dried under reduced pressure and the resulting residue was taken up in CDCl<sub>3</sub> (*ca.* 1 mL), mesitylene (30  $\mu$ L, 0.22 mmol, 0.22 equiv.) was added, and a 400  $\mu$ L aliquot was transferred to an NMR tube for analysis.

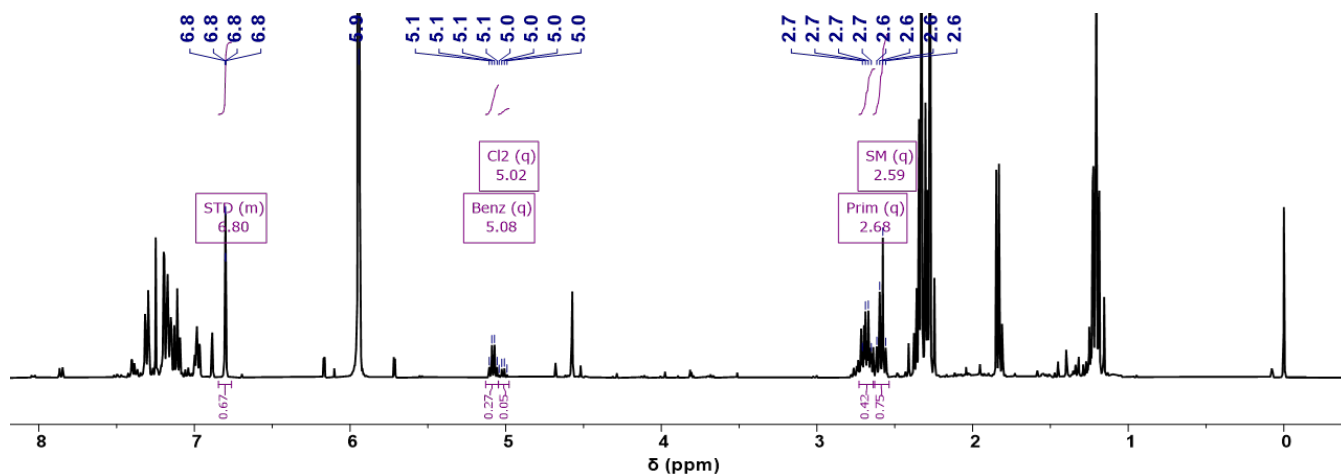

**Figure S2.**  $^1\text{H}$  NMR Spectrum (400 MHz, 24 °C,  $\text{CDCl}_3$ ) of a representative  $\text{Ag}/t\text{BuOCl}$  chlorination of 4-ethyltoluene (crude). The diagnostic peaks for  $2^\circ$  benzylic (Benz–5.07 ppm),  $1^\circ$  benzylic (Prim–2.70 ppm), dichlorination ( $1^\circ/2^\circ$  Cl2–5.02 ppm), and unreacted starting material (SM–2.60 ppm) are labeled accordingly.

**$\text{SO}_2\text{Cl}_2$ :** A 4 mL septa-capped scintillation vial was charged with 4-ethyltoluene (145  $\mu\text{L}$ , 1.0 mmol, 1 equiv.), a stock solution of bis(benzoyl)peroxide in chlorobenzene (250  $\mu\text{L}$ , 0.04 M, 0.01 equiv.), and a stir bar. The vial was sealed and the contents sparged with dinitrogen for 30 seconds.  $\text{SO}_2\text{Cl}_2$  (80  $\mu\text{L}$ , 1.0 mmol, 1 equiv.) was injected through the septum cap and the vial placed in a pre-heated 75 °C aluminum block. Stirring was initiated and the reaction was left for 4 hours.

At this time, the reaction was cooled to room temperature, diluted with chlorobenzene (0.5 mL) and filtered through a silica plug (*ca.* 3" in a 9" Pasteur pipette). The vial was rinsed with additional portions of chlorobenzene (0.5 mL  $\times$  2) which was likewise passed through the plug. Mesitylene (30  $\mu\text{L}$ , 0.22 mmol, 0.22 equiv.) was added to the combined filtrates as an internal standard. A 30  $\mu\text{L}$  aliquot was transferred to an NMR tube, diluted with  $\text{CDCl}_3$  (500  $\mu\text{L}$ ), and analyzed by  $^1\text{H}$  NMR spectroscopy.

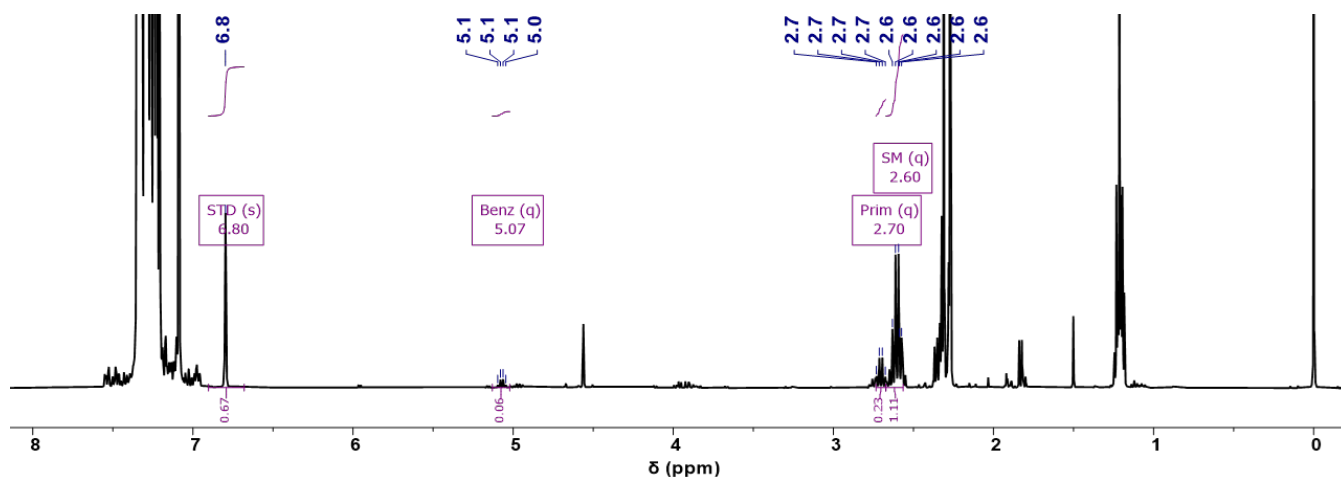

**Figure S3.**  $^1\text{H}$  NMR Spectrum (400 MHz, 24 °C,  $\text{CDCl}_3$ ) of a representative  $\text{SO}_2\text{Cl}_2$  chlorination of 4-ethyltoluene (crude). The diagnostic peaks for  $2^\circ$  benzylic (Benz–5.07 ppm),  $1^\circ$  benzylic (Prim–2.70 ppm), and unreacted starting material (SM–2.60 ppm) are labeled accordingly.

**Table S1.** Summary of chlorination results.

|                                              | SM | 2° C-H | 1° C-H | Difunctionalization | 2° Benzylic Selectivity |
|----------------------------------------------|----|--------|--------|---------------------|-------------------------|
| Cu/NFSI Methoxylation                        | -- | 60     | 6      | --                  | 91%                     |
| Ag <sup>t</sup> BuOCl Chlorination           | 37 | 27     | 21     | 5                   | 56%                     |
| SO <sub>2</sub> Cl <sub>2</sub> Chlorination | 55 | 6      | 12     | --                  | 33%                     |

## 2. Crystallographic data

### 2.1. Crystal growth

In a dinitrogen glovebox, a 2 mL scintillation vial was charged with bathophenanthroline (33.24 mg, 0.1 mmol, 1 equiv.) [Sigma Aldrich], dibenzenesulfonamide (59.4 mg, 0.2 mmol, 2 equiv.) [TCI], copper(II) fluoride dihydrate (13.8 mg, 0.1 mmol, 1 equiv.) [Sigma Aldrich], and a magnetic stir bar. Chlorobenzene (1 mL) was added, and the vial was sealed with a septum cap. The reaction was removed from the glovebox and stirred at 50 °C for 12 hours. Upon cooling, blue microcrystals were observed to precipitate from a deep green solution.

In a chemical fume hood (without exclusion of moisture or air), the solids were collected via filtration through a glass microfiber and taken up in minimal dichloromethane, giving a green solution. Vapor diffusion of pentane into this concentrated DCM solution afforded single crystals of BphenCu(NSI)(Cl) suitable for X-ray diffraction studies, as described in detail below.

### 2.2. Data collection

A colorless crystal with approximate dimensions 0.09 × 0.06 × 0.03 mm<sup>3</sup> was selected under oil under ambient conditions and attached to the tip of a MiTeGen MicroMount®. The crystal was mounted in a stream of cold nitrogen at 100(1) K and centered in the X-ray beam by using a video camera.

The crystal evaluation and data collection were performed on a Bruker Quazar SMART APEXII diffractometer with Mo K<sub>α</sub> (λ = 0.71073 Å) radiation and the diffractometer to crystal distance of 4.96 cm.<sup>4</sup>

The initial cell constants were obtained from three series of ω scans at different starting angles. Each series consisted of 12 frames collected at intervals of 0.5° in a 6° range about ω with the exposure time of 60 seconds per frame. The reflections were successfully indexed by an automated indexing routine built in the APEXII program suite. The final cell constants were calculated from a set of 5769 strong reflections from the actual data collection.

The data were collected by using the full sphere data collection routine to survey the reciprocal space to the extent of a full sphere to a resolution of 0.75 Å. A total of 21819 data were harvested by collecting 4 sets of frames with

0.4° scans in  $\omega$  and  $\varphi$  with exposure times of 90 sec per frame. These highly redundant datasets were corrected for Lorentz and polarization effects. The absorption correction was based on fitting a function to the empirical transmission surface as sampled by multiple equivalent measurements.<sup>5</sup>

### 2.3. Structure solution and refinement

The diffraction data were consistent for the space groups  $P\bar{1}$  and  $P1$ . The  $E$ -statistics strongly suggested the centrosymmetric space group  $P\bar{1}$  that yielded chemically reasonable and computationally stable results of refinement.<sup>6-9</sup>

A successful solution by the direct methods provided most non-hydrogen atoms from the  $E$ -map. The remaining non-hydrogen atoms were located in an alternating series of least-squares cycles and difference Fourier maps. All non-hydrogen atoms were refined with anisotropic displacement coefficients. All hydrogen atoms were included in the structure factor calculation at idealized positions and were allowed to ride on the neighboring atoms with relative isotropic displacement coefficients.

There were several peaks of electron density in the structure that corresponded to solvent molecules of dichloromethane and pentane. It is likely that these solvent molecules are disordered over several positions and therefore have electron density that is diffuse. A significant amount of time was invested in identifying and refining the disordered molecules. Bond length constraints were applied to model the molecules, but the resulting isotropic displacement coefficients suggested the molecules were mobile. In addition, the refinement was computationally unstable. Option SQUEEZE of program PLATON was used to correct the diffraction data for diffuse scattering effects and to identify the solvate molecule.<sup>10</sup> PLATON calculated the upper limit of volume that can be occupied by the solvent to be 153 Å<sup>3</sup>, or 9.1% of the unit cell volume. The program calculated 53 electrons in the unit cell for the diffuse species. This approximately corresponds to 1.25 molecules of solvent, where this solvent may be DCM, pentane, or a combination of the two, in the unit cell (52.5 electrons). Please note that all derived results in the following tables are based on the known contents. No data are given for the diffusely scattering species.

The final least-squares refinement of 424 parameters against 8335 data resulted in residuals  $R$  (based on  $F^2$  for  $I \geq 2\sigma$ ) and  $wR$  (based on  $F^2$  for all data) of 0.0397 and 0.1002, respectively. The final difference Fourier map was featureless.

## 2.4. Summary

**Crystal Data** for  $C_{36}H_{26}ClCuN_3O_4S_2$  ( $M = 727.71$  g/mol): triclinic, space group  $P\bar{1}$  (no. 2),  $a = 10.232(3)$  Å,  $b = 10.735(4)$  Å,  $c = 16.557(8)$  Å,  $\alpha = 85.248(14)^\circ$ ,  $\beta = 72.999(17)^\circ$ ,  $\gamma = 74.424(14)^\circ$ ,  $V = 1675.3(11)$  Å<sup>3</sup>,  $Z = 2$ ,  $T = 99.99$  K,  $\mu(\text{Mo } K\alpha) = 0.900$  mm<sup>-1</sup>,  $D_{\text{calc}} = 1.443$  g/cm<sup>3</sup>, 21819 reflections measured ( $2.572^\circ \leq 2\theta \leq 56.714^\circ$ ), 8335 unique ( $R_{\text{int}} = 0.0381$ ,  $R_{\text{sigma}} = 0.0523$ ) which were used in all calculations. The final  $R_1$  was 0.0397 ( $I > 2\sigma(I)$ ) and  $wR_2$  was 0.1002 (all data).

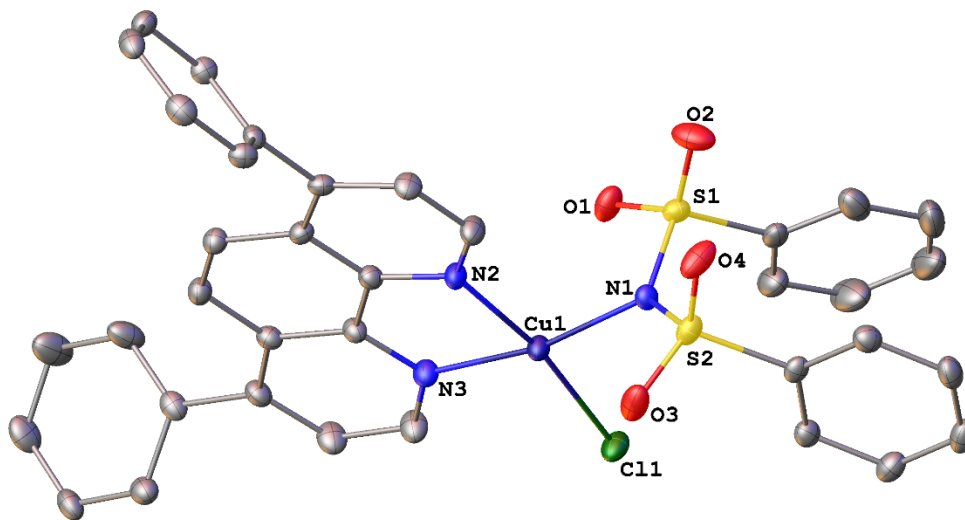

**Figure S4.** A molecular drawing of  $[(\text{BPhen})\text{Cu}^{\text{II}}(\text{Cl})(\text{NSI})]$  (BPhen = Bathophenanthroline; NSI = *N*-sulfonimidyl) shown with 50% probability ellipsoids. All H atoms are omitted.

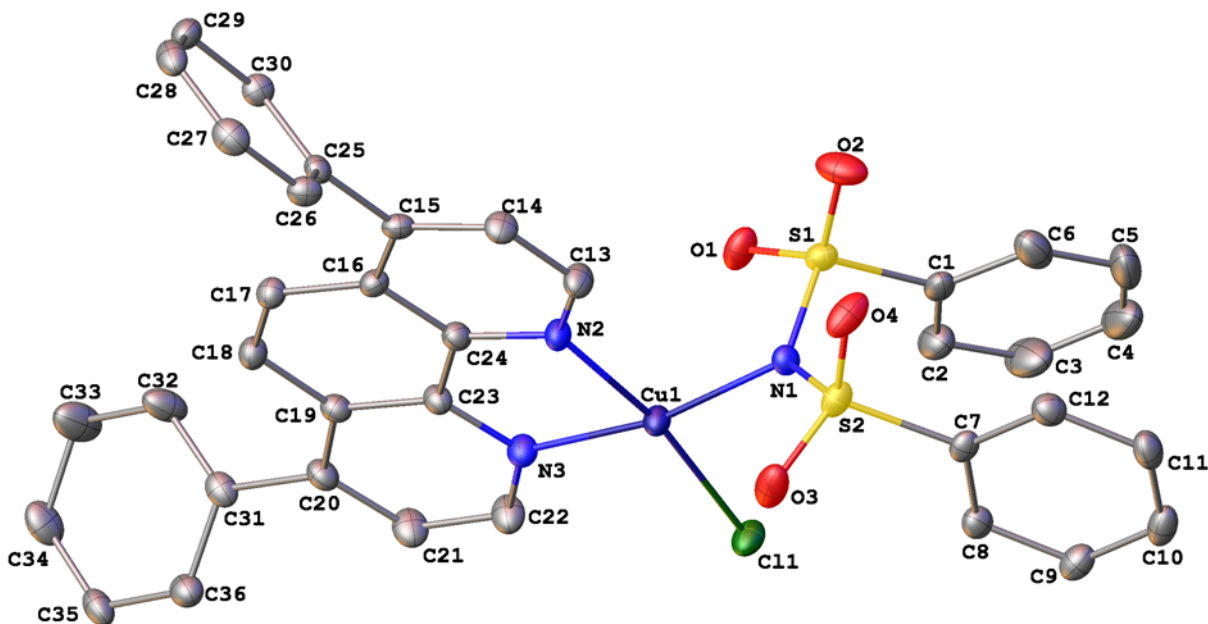

**Figure S5.** A molecular drawing of  $[(\text{BPhen})\text{Cu}^{\text{II}}(\text{Cl})(\text{NSI})]$  shown with 50% probability ellipsoids and all non-H atoms labeled. All H atoms are omitted.

**Table S2.** Crystal data and structure refinement for [(BPhen)Cu<sup>II</sup>(Cl)(NSI)].

|                                             |                                                                                  |
|---------------------------------------------|----------------------------------------------------------------------------------|
| Empirical formula                           | C <sub>36</sub> H <sub>26</sub> ClCuN <sub>3</sub> O <sub>4</sub> S <sub>2</sub> |
| Formula weight                              | 727.71                                                                           |
| Temperature/K                               | 99.99                                                                            |
| Crystal system                              | triclinic                                                                        |
| Space group                                 | $P\bar{1}$                                                                       |
| a/Å                                         | 10.232(3)                                                                        |
| b/Å                                         | 10.735(4)                                                                        |
| c/Å                                         | 16.557(8)                                                                        |
| $\alpha$ /°                                 | 85.248(14)                                                                       |
| $\beta$ /°                                  | 72.999(17)                                                                       |
| $\gamma$ /°                                 | 74.424(14)                                                                       |
| Volume/Å <sup>3</sup>                       | 1675.3(11)                                                                       |
| Z                                           | 2                                                                                |
| $\rho_{\text{calc}}/\text{g cm}^{-3}$       | 1.443                                                                            |
| $\mu/\text{mm}^{-1}$                        | 0.900                                                                            |
| F(000)                                      | 746.0                                                                            |
| Crystal size/mm <sup>3</sup>                | 0.09 × 0.06 × 0.03                                                               |
| Radiation                                   | Mo K $\alpha$ ( $\lambda = 0.71073$ )                                            |
| 2 $\Theta$ range for data collection/°      | 2.572 to 56.714                                                                  |
| Index ranges                                | -13 ≤ h ≤ 13, -13 ≤ k ≤ 14, -22 ≤ l ≤ 22                                         |
| Reflections collected                       | 21819                                                                            |
| Independent reflections                     | 8335 [ $R_{\text{int}} = 0.0381$ , $R_{\text{sigma}} = 0.0523$ ]                 |
| Data/restraints/parameters                  | 8335/0/424                                                                       |
| Goodness-of-fit on F <sup>2</sup>           | 1.032                                                                            |
| Final R indexes [ $I > 2\sigma(I)$ ]        | $R_1 = 0.0397$ , $wR_2 = 0.0934$                                                 |
| Final R indexes [all data]                  | $R_1 = 0.0599$ , $wR_2 = 0.1002$                                                 |
| Largest diff. peak/hole / e Å <sup>-3</sup> | 0.62/-0.61                                                                       |



### 3. "Correction" to calculated Gibbs free energy due to standard-state concentration changes

We note that the thermal contributions to Gibbs free energies were calculated in the gas phase, where the standard state is 1 atm pressure. Using the ideal gas law ( $PV = nRT$ ), we can determine the concentration ( $c$ ) in the gas phase:  $c = n/V = P/RT$ . Therefore, at 298 K, the concentration in the gas phase is approximately 1 mole per 24.46 L, which is significantly more dilute than the standard state concentration in solution, which is 1 mole per 1 L. The loss of translational entropy associated with transferring 1 mole of gas from 24.46 L to 1 L can be calculated as  $RT \cdot \ln(24.46)$ , where  $T$  is 298 K. This calculation yields a value of approximately 1.89 kcal/mol. This concentration correction term was added to the absolute free energies of all the computed species.

### 4. Cartesian coordinates of DFT computed structures

Cartesian coordinates of all DFT-optimized structures can be accessed from the coordinate file (.xyz).

### 5. Structures of 'small' species involved in the study and their energetics

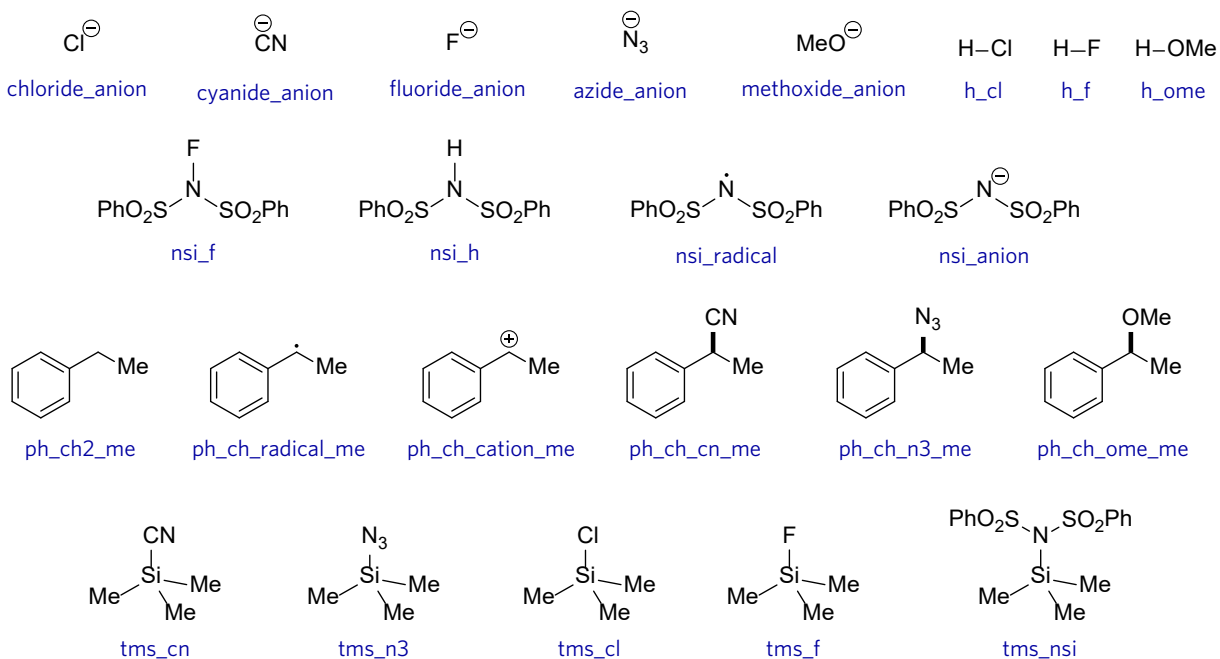

**Figure S6.** Line drawing of the structures, the energetics of which are shown in **Table S3**.

**Table S3.** Electronic energies, Gibbs free energies ( $G$ ) and thermal contribution to  $G$  for structures shown in **Figure S6**. Energies are reported in hartree computed at M06-D3(0)/basis-II/SMD(DCM)//M06-D3(0)/basis-I level of theory at 298.15 K.

| File/Structure name | Electronic energy (hartree) | Thermal contribution to $G$ (hartree) | Gibbs free energy ( $G$ , hartree) |
|---------------------|-----------------------------|---------------------------------------|------------------------------------|
| chloride_anion      | -460.3566184                | -0.015023                             | -460.3686214                       |
| cyanide_anion       | -92.92258794                | -0.014065                             | -92.93363294                       |
| fluoride_anion      | -99.9827974                 | -0.014159                             | -99.9939364                        |
| azide_anion         | -164.2910419                | -0.005229                             | -164.2932509                       |
| methoxide_anion     | -115.1754287                | 0.014324                              | -115.1580847                       |
| h_cl                | -460.8009944                | -0.011116                             | -460.8090904                       |
| h_f                 | -100.4647966                | -0.006813                             | -100.4685896                       |
| h_ome               | -115.7057932                | 0.028262                              | -115.6745112                       |
| nsi_f               | -1714.86359                 | 0.163969                              | -1714.696601                       |
| nsi_h               | -1615.703549                | 0.172178                              | -1615.528351                       |
| nsi_radical         | -1615.022297                | 0.157542                              | -1614.861735                       |
| nsi_anion           | -1615.248438                | 0.161729                              | -1615.083689                       |
| ph_ch2_me           | -310.7432788                | 0.123488                              | -310.6167708                       |
| ph_ch_radical_me    | -310.098379                 | 0.108837                              | -309.986522                        |
| ph_ch_cation_me     | -309.928012                 | 0.112352                              | -309.81264                         |
| ph_ch_cn_me         | -402.9654835                | 0.120144                              | -402.8423195                       |
| ph_ch_n3_me         | -474.30557                  | 0.123343                              | -474.179207                        |
| ph_ch_ome_me        | -425.2485005                | 0.152817                              | -425.0926635                       |
| tms_cn              | -502.043427                 | 0.083668                              | -501.956739                        |
| tms_n3              | -573.4156522                | 0.08705                               | -573.3255822                       |
| tms_cl              | -869.467307                 | 0.077618                              | -869.386669                        |
| tms_f               | -509.1372918                | 0.079341                              | -509.0549308                       |
| tms_nsi             | -2024.354047                | 0.265367                              | -2024.08566                        |

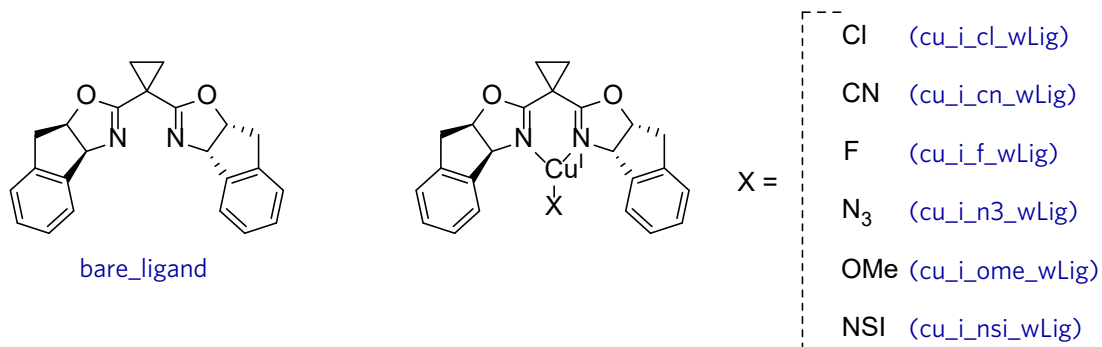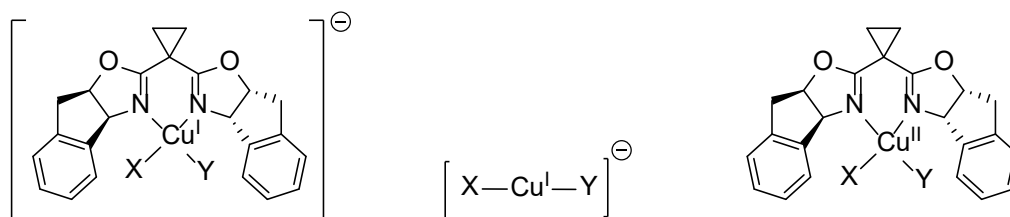

| X              | Y              | file_name               | file_name                | file_name          |
|----------------|----------------|-------------------------|--------------------------|--------------------|
| Cl             | F              | cu_i_cl_f_anion_wLig    | cu_i_cl_f_anion_noLig    | cu_ii_cl_f_wLig    |
| Cl             | CN             | cu_i_cl_cn_anion_wLig   | cu_i_cl_cn_anion_noLig   | cu_ii_cl_cn_wLig   |
| Cl             | N <sub>3</sub> | cu_i_cl_n3_anion_wLig   | cu_i_cl_n3_anion_noLig   | cu_ii_cl_n3_wLig   |
| Cl             | OMe            | cu_i_cl_ome_anion_wLig  | cu_i_cl_ome_anion_noLig  | cu_ii_cl_ome_wLig  |
| CN             | CN             | cu_i_cn_cn_anion_wLig   | cu_i_cn_cn_anion_noLig   | cu_ii_cn_cn_wLig   |
| N <sub>3</sub> | N <sub>3</sub> | cu_i_n3_n3_anion_wLig   | cu_i_n3_n3_anion_noLig   | cu_ii_n3_n3_wLig   |
| OMe            | OMe            | cu_i_ome_ome_anion_wLig | cu_i_ome_ome_anion_noLig | cu_ii_ome_ome_wLig |
| NSI            | Cl             | cu_i_nsi_cl_anion_wLig  | cu_i_nsi_cl_anion_noLig  | cu_ii_nsi_cl_wLig  |
| NSI            | CN             | cu_i_nsi_cn_anion_wLig  | cu_i_nsi_cn_anion_noLig  | cu_ii_nsi_cn_wLig  |
| NSI            | N <sub>3</sub> | cu_i_nsi_n3_anion_wLig  | cu_i_nsi_n3_anion_noLig  | cu_ii_nsi_n3_wLig  |
| NSI            | OMe            | cu_i_nsi_ome_anion_wLig | cu_i_nsi_ome_anion_noLig | cu_ii_nsi_ome_wLig |
| F              | CN             | --                      | --                       | cu_ii_f_cn_wLig    |
| F              | N <sub>3</sub> | --                      | --                       | cu_ii_f_n3_wLig    |
| F              | OMe            | --                      | --                       | cu_ii_f_ome_wLig   |

**Figure S7.** Line drawing of the structures, the energetics of which are shown in **Table S4**.

**Table S4.** Electronic energies, Gibbs free energies ( $G$ ) and thermal contribution to  $G$  for structures shown in **Figure S7**. Energies are reported in hartree computed at M06-D3(0)/basis-II/SMD(DCM)//M06-D3(0)/basis-I level of theory at 298.15 K.

| File/Structure name              | Electronic energy (hartree) | Thermal contribution to $G$ (hartree) | Gibbs free energy ( $G$ , hartree) |
|----------------------------------|-----------------------------|---------------------------------------|------------------------------------|
| bare_ligand                      | -1148.054231                | 0.331746                              | -1147.719465                       |
| cu_i_cl_wLig                     | -3248.867115                | 0.32971                               | -3248.534385                       |
| cu_i_cn_wLig                     | -2881.454109                | 0.335841                              | -2881.115248                       |
| cu_i_f_wLig                      | -2888.490469                | 0.331158                              | -2888.156291                       |
| cu_i_n3_wLig                     | -2952.802895                | 0.339553                              | -2952.460322                       |
| cu_i_ome_wLig                    | -2903.708631                | 0.367198                              | -2903.338413                       |
| cu_i_nsi_wLig                    | -4403.764756                | 0.51877                               | -4403.242966                       |
| cu_i_cl_f_anion_wLig             | -3348.845709                | 0.325324                              | -3348.517365                       |
| cu_i_cl_cn_anion_wLig            | -3341.810759                | 0.331034                              | -3341.476705                       |
| cu_i_cl_n3_anion_wLig            | -3413.164522                | 0.334845                              | -3412.826657                       |
| cu_i_cl_ome_anion_wLig           | -3364.065486                | 0.363079                              | -3363.699387                       |
| cu_i_cn_cn_anion_wLig            | -2974.395227                | 0.337769                              | -2974.054438                       |
| cu_i_n3_n3_anion_wLig            | -3117.102774                | 0.345755                              | -3116.753999                       |
| cu_i_ome_ome_anion_wLig          | -3018.909199                | 0.399839                              | -3018.50634                        |
| cu_i_nsi_cl_anion_wLig           | -4864.142238                | 0.518854                              | -4863.620364                       |
| cu_i_nsi_cn_anion_wLig           | -4496.730502                | 0.524223                              | -4496.203259                       |
| cu_i_nsi_n3_anion_wLig           | -4568.080933                | 0.528012                              | -4567.549901                       |
| cu_i_nsi_ome_anion_wLig          | -4518.986496                | 0.557431                              | -4518.426045                       |
| cu_i_cl_f_anion_noLig            | -2200.793025                | -0.02419                              | -2200.814195                       |
| cu_i_cl_cn_anion_noLig           | -2193.751388                | -0.018774                             | -2193.767142                       |
| cu_i_cl_n3_anion_noLig           | -2265.10091                 | -0.017388                             | -2265.115278                       |
| cu_i_cl_ome_anion_noLig          | -2216.007429                | 0.009145                              | -2215.995264                       |
| cu_i_cn_cn_anion_noLig           | -1826.33348                 | -0.006901                             | -1826.337361                       |
| cu_i_n3_n3_anion_noLig           | -1969.035998                | -0.008508                             | -1969.041486                       |
| cu_i_ome_ome_anion_noLig         | -1870.849378                | 0.044464                              | -1870.801894                       |
| cu_i_nsi_cl_anion_noLig          | -3716.0521                  | 0.157846                              | -3715.891234                       |
| cu_i_nsi_cn_anion_noLig          | -3348.63815                 | 0.163664                              | -3348.471466                       |
| cu_i_nsi_n3_anion_noLig          | -3419.987681                | 0.167222                              | -3419.817439                       |
| cu_i_nsi_ome_anion_noLig         | -3370.894047                | 0.193893                              | -3370.697134                       |
| cu_ii_form_nfsi_TS_brk_symS_cnf1 | -4963.7242059               | 0.5187340                             | -4963.2024519                      |
| cu_ii_form_nfsi_TS_brk_symS_cnf2 | -4963.7296482               | 0.5173140                             | -4963.2093142                      |
| cu_ii_cl_f_wLig                  | -3348.720527                | 0.332203                              | -3348.385304                       |
| cu_ii_cl_cn_wLig                 | -3341.664771                | 0.335583                              | -3341.326168                       |
| cu_ii_cl_n3_wLig                 | -3413.027934                | 0.339519                              | -3412.685395                       |
| cu_ii_cl_ome_wLig                | -3363.946076                | 0.367501                              | -3363.575555                       |
| cu_ii_cn_cn_wLig                 | -2974.244037                | 0.341096                              | -2973.899921                       |
| cu_ii_n3_n3_wLig                 | -3116.970593                | 0.350062                              | -3116.617511                       |
| cu_ii_ome_ome_wLig               | -3018.800645                | 0.406324                              | -3018.391301                       |
| cu_ii_nsi_cl_wLig                | -4863.973235                | 0.52058                               | -4863.449635                       |
| cu_ii_nsi_cn_wLig                | -4496.553776                | 0.52611                               | -4496.024646                       |
| cu_ii_nsi_n3_wLig                | -4567.911648                | 0.531343                              | -4567.377285                       |
| cu_ii_nsi_ome_wLig               | -4518.835813                | 0.559404                              | -4518.273389                       |
| cu_ii_f_cn_wLig                  | -2981.300857                | 0.337911                              | -2980.959926                       |
| cu_ii_f_n3_wLig                  | -3052.664534                | 0.342261                              | -3052.319253                       |
| cu_ii_f_ome_wLig                 | -3003.581434                | 0.370152                              | -3003.208262                       |

## 6. All ligand exchange energetics

**Table S5.** Ligand exchange energetics starting from two key Cu<sup>II</sup> resting states: LCu<sup>II</sup>(Cl)(F) and LCu<sup>II</sup>(Cl)(NSI). Gibbs free energies (kcal/mol) are computed at M06-D3(0)/basis-II/SMD(DCM)//M06-D3(0)/basis-I level of theory at 298.15 K. Solid lines indicate the energetically favored route (energetics are highlighted in blue), while dashed lines indicate the alternative ligand exchange route.

| A. LCu <sup>II</sup> (Cl)(F) |                       |                       |                       |                       | B. LCu <sup>II</sup> (Cl)(NSI) |                       |                       |                       |                       |
|------------------------------|-----------------------|-----------------------|-----------------------|-----------------------|--------------------------------|-----------------------|-----------------------|-----------------------|-----------------------|
|                              | $\Delta G^\circ_{1a}$ | $\Delta G^\circ_{1b}$ | $\Delta G^\circ_{2a}$ | $\Delta G^\circ_{2b}$ |                                | $\Delta G^\circ_{3a}$ | $\Delta G^\circ_{3b}$ | $\Delta G^\circ_{4a}$ | $\Delta G^\circ_{4b}$ |
| X                            |                       |                       |                       |                       | X                              |                       |                       |                       |                       |
| CN                           | -24.5                 | -2.9                  | -2.3                  | -24.0                 | CN                             | -3.1                  | -3.4                  | -2.6                  | -2.3                  |
| N <sub>3</sub>               | -18.5                 | 3.1                   | 4.3                   | -17.3                 | N <sub>3</sub>                 | 7.1                   | 2.6                   | -0.2                  | 4.3                   |
| OMe                          | 9.8                   | 26.6                  | 31.2                  | 14.4                  | OMe                            | 26.1                  | 12.7                  | 17.7                  | 31.2                  |

## 7. Favored reduced state of various LCu<sup>II</sup> species

**Table S6.** Four possible routes for the oxidation of a benzyl radical into a benzyl cation by an LCu<sup>II</sup> species. Gibbs free energies (kcal/mol) are computed at M06-D3(0)/basis-II/SMD(DCM)//M06-D3(0)/basis-I level of theory at 298.15 K. In each case, the energetically favored route is highlighted in blue.

$$\text{LCu}^{\text{II}}(\text{X})(\text{Y}) + \text{PhCH}(\bullet)\text{CH}_3 \xrightarrow{\Delta G^\circ_n} \text{"Reduced copper species"} + \text{PhCH}(+)\text{CH}_3$$

| LCu <sup>II</sup> (X)(Y)<br>Species                  | $\Delta G^\circ_1$                     | $\Delta G^\circ_2$                        | $\Delta G^\circ_3$                    | $\Delta G^\circ_4$                    |
|------------------------------------------------------|----------------------------------------|-------------------------------------------|---------------------------------------|---------------------------------------|
|                                                      | [LCu <sup>I</sup> (X)(Y)] <sup>-</sup> | L + [Cu <sup>I</sup> (X)(Y)] <sup>-</sup> | LCu <sup>I</sup> (X) + Y <sup>-</sup> | LCu <sup>I</sup> (Y) + X <sup>-</sup> |
|                                                      | $\Delta G_1^\circ$                     | $\Delta G_2^\circ$                        | $\Delta G_3^\circ$                    | $\Delta G_4^\circ$                    |
| LCu <sup>II</sup> (Cl)(F)                            | 26.2                                   | 16.0                                      | 19.4                                  | 21.5                                  |
| LCu <sup>II</sup> (Cl)(CN)                           | 14.6                                   | 8.4                                       | 20.1                                  | 10.2                                  |
| LCu <sup>II</sup> (Cl)(N <sub>3</sub> )              | 20.5                                   | 15.4                                      | 19.9                                  | 19.0                                  |
| LCu <sup>II</sup> (Cl)(OMe)                          | 31.4                                   | 21.8                                      | 35.7                                  | 26.6                                  |
| LCu <sup>II</sup> (CN)(CN)                           | 12.2                                   | 10.7                                      | 15.6                                  | 15.6                                  |
| LCu <sup>II</sup> (N <sub>3</sub> )(N <sub>3</sub> ) | 23.5                                   | 19.1                                      | 23.7                                  | 23.7                                  |
| LCu <sup>II</sup> (OMe)(OMe)                         | 36.9                                   | 27.5                                      | 43.1                                  | 43.1                                  |
| LCu <sup>II</sup> (NSI)(Cl)                          | 2.0                                    | 8.0                                       | 7.5                                   | 3.4                                   |
| LCu <sup>II</sup> (NSI)(CN)                          | -3.0                                   | 4.8                                       | 13.8                                  | -0.3                                  |
| LCu <sup>II</sup> (NSI)(N <sub>3</sub> )             | 0.8                                    | 9.0                                       | 9.4                                   | 4.5                                   |
| LCu <sup>II</sup> (NSI)(OMe)                         | 13.3                                   | 19.2                                      | 29.0                                  | 15.8                                  |

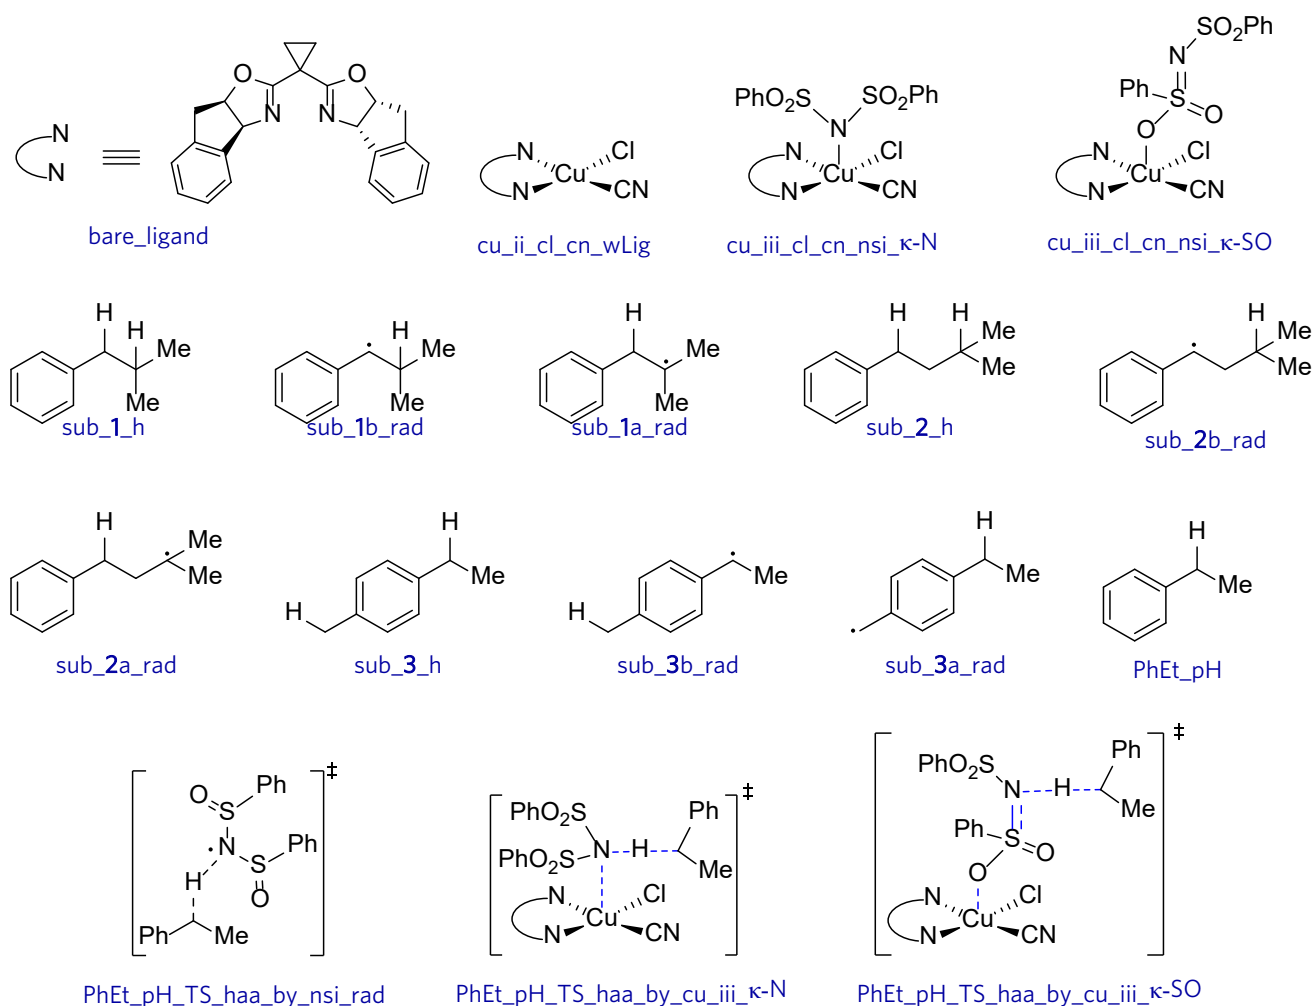

**Figure S8.** Line drawing of the structures, the energetics of which are shown in **Table S7**.

**Table S7.** Electronic energies, Gibbs free energies ( $G$ ) and thermal contribution to  $G$  for structures shown in Figure S8. Energies are reported in hartree computed at M06-D3(0)/basis-II/SMD(DCM)//M06-D3(0)/basis-I level of theory at 298.15 K.

| File/Structure name            | Electronic energy (hartree) | Thermal contribution to $G$ (hartree) | Gibbs free energy ( $G$ , hartree) |
|--------------------------------|-----------------------------|---------------------------------------|------------------------------------|
| nsi_radical                    | -1615.022297                | 0.157542                              | -1614.861735                       |
| cu_ii_cl_cn_wLig               | -3341.664771                | 0.335583                              | -3341.326168                       |
| cu_iii_cl_cn_nsi_k-N_RS        | -4956.7273112               | 0.5287630                             | -4956.1955282                      |
| cu_iii_cl_cn_nsi_k-N_brk_symS  | -4956.704249 <sup>†</sup>   | 0.5252400                             | -4956.1759898                      |
| cu_iii_cl_cn_nsi_k-N_T         | -4956.7068440               | 0.5246150                             | -4956.1792090                      |
| cu_iii_cl_cn_nsi_k-SO_RS       | -4956.7337645               | 0.5286310                             | -4956.2021135                      |
| cu_iii_cl_cn_nsi_k-SO_brk_symS | -4956.710175 <sup>†</sup>   | 0.5223460                             | -4956.1848096                      |
| cu_iii_cl_cn_nsi_k-SO_T        | -4956.7104931               | 0.5224370                             | -4956.1850361                      |

|                               |                           |           |              |
|-------------------------------|---------------------------|-----------|--------------|
| sub_1_h                       | -389.3375372              | 0.176965  | -389.1575522 |
| sub_1b_rad                    | -388.6905559              | 0.162152  | -388.5253839 |
| sub_1a_rad                    | -388.6799161              | 0.160834  | -388.5160621 |
| sub_2_h                       | -428.6339164              | 0.202197  | -428.4286994 |
| sub_2b_rad                    | -427.988414               | 0.188536  | -427.796858  |
| sub_2a_rad                    | -427.9749652              | 0.185375  | -427.7865702 |
| sub_3_h                       | -350.0425106              | 0.147562  | -349.8919286 |
| sub_3b_rad                    | -349.398152               | 0.132826  | -349.262306  |
| sub_3a_rad                    | -349.3922521              | 0.135179  | -349.2540531 |
| PhEt_pH                       | -310.7432788              | 0.123488  | -310.6167708 |
| PhEt_pH_TS_haa_by_nsi_rad     | -1925.777419              | 0.305364  | -1925.469035 |
| PhEt_pH_TS_haa_by_cu_iii_κ-N  | -5267.462844 <sup>†</sup> | 0.669215  | -5266.790609 |
| PhEt_pH_TS_haa_by_cu_iii_κ-SO | -5267.470967 <sup>†</sup> | 0.66779   | -5266.800157 |
| nsi_h                         | -1615.703549              | 0.172178  | -1615.528351 |
| cu_iii_cl_cn_nsi_κ-SO         | -4956.733764              | 0.528631  | -4956.202113 |
| sub_1b_TS_haa_by_cu_iii_κ-SO  | -5346.066294 <sup>†</sup> | 0.720929  | -5345.342345 |
| sub_1a_TS_haa_by_cu_iii_κ-SO  | -5346.057671 <sup>†</sup> | 0.720025  | -5345.334626 |
| sub_2b_TS_haa_by_cu_iii_κ-SO  | -5385.365109 <sup>†</sup> | 0.747347  | -5384.614742 |
| sub_2a_TS_haa_by_cu_iii_κ-SO  | -5385.355767 <sup>†</sup> | 0.7467    | -5384.606047 |
| sub_3b_TS_haa_by_cu_iii_κ-SO  | -5306.775018 <sup>†</sup> | 0.69206   | -5306.079938 |
| sub_3a_TS_haa_by_cu_iii_κ-SO  | -5306.771207 <sup>†</sup> | 0.692431  | -5306.075756 |
| tBuO(rad)                     | -232.9342173              | 0.090973  | -232.8402243 |
| tBuO_h                        | -233.6107594              | 0.105438  | -233.5023014 |
| sub_1b_TS_haa_by_tBuO(rad)    | -622.2680579              | 0.283144  | -621.9818939 |
| sub_1a_TS_haa_by_tBuO(rad)    | -622.2664424              | 0.283325  | -621.9800974 |
| sub_2b_TS_haa_by_tBuO(rad)    | -661.5643339              | 0.309355  | -661.2519589 |
| sub_2a_TS_haa_by_tBuO(rad)    | -661.5618836              | 0.308837  | -661.2500266 |
| sub_3b_TS_haa_by_tBuO(rad)    | -582.9735115              | 0.254561  | -582.7159305 |
| sub_3a_TS_haa_by_tBuO(rad)    | -582.970743               | 0.25578   | -582.711943  |
| cl(rad)                       | -460.1300163              | -0.015677 | -460.1426733 |
| cl_h                          | -460.8009944              | -0.011116 | -460.8090904 |
| sub_1b_TS_haa_by_cl(rad)      | -849.4830737              | 0.167144  | -849.3129097 |

<sup>†</sup>Electronic energies for these broken-symmetry singlet systems are made spin contamination free following the Yamaguchi scheme.

## 8. Resting state of the •NSI radical

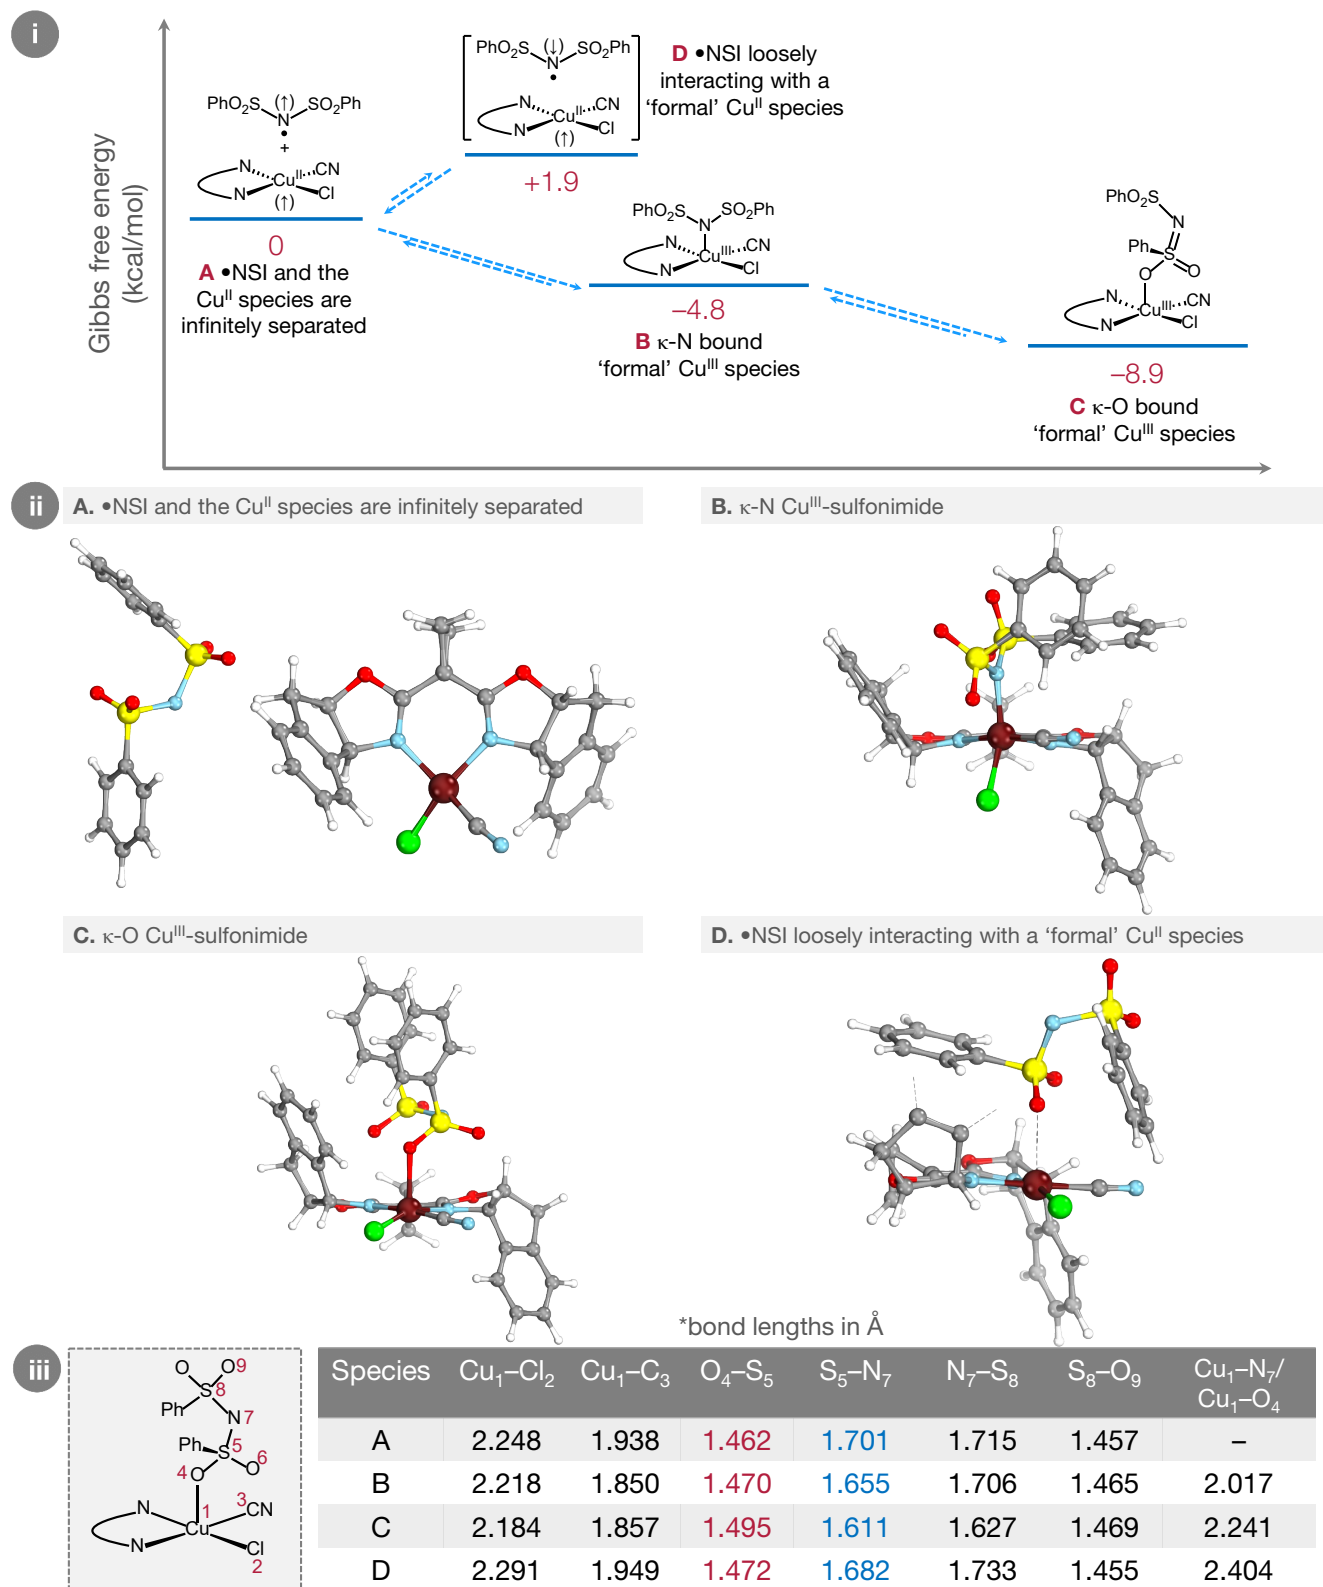

**Figure S9.** (i) Energetic comparison of free •NSI and that docked at a Cu<sup>II</sup> species. Gibbs free energies (kcal/mol) are computed at M06-D3(0)/basis-II/SMD(DCM)//M06-D3(0)/basis-I level of theory at 298.15 K. (ii) Structures of various species (A–D) relevant to finding the resting state of the •NSI. (iii) Key bond lengths (Ångström) of A–D are tabulated. Inspection of the O<sub>4</sub>–S<sub>5</sub> bond lengths of A–D (highlighted in red) reveals that it is *longest* in C, whereas for S<sub>5</sub>–N<sub>7</sub> bond lengths (highlighted in blue), it is *shortest* in C.



## 9. Spin density plots and relative energies of all Cu/NSI species explored

To comprehend the structural and energetic distinctions among the spin-isomers of the  $\kappa$ -N and  $\kappa$ -O Cu/ $\bullet$ NSI species examined in this investigation, we conducted a comprehensive exploration of their closed-shell and open-shell singlet, as well as triplet states. The relative energies of these complexes were determined with respect to the isolated  $\text{LCu}^{\text{II}}(\text{Cl})(\text{CN})$  and  $\bullet$ NSI species, and the positions of the unpaired spins are depicted in **Figure S10**. Absolute electronic energies and thermal contribution to Gibbs free energies of all six species are depicted in **Table S7**.

(i)  $\kappa$ -N Cu/NSI

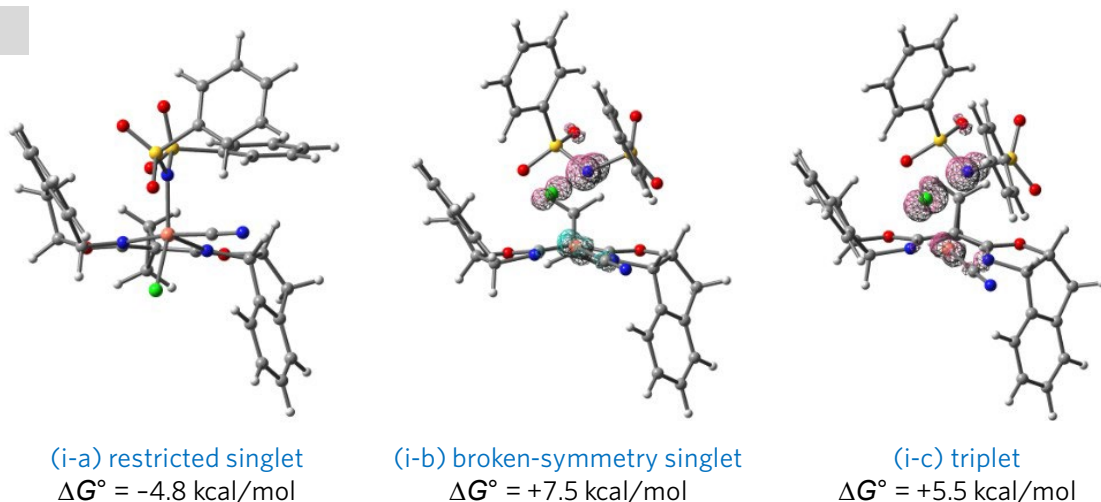

(ii)  $\kappa$ -O Cu/NSI

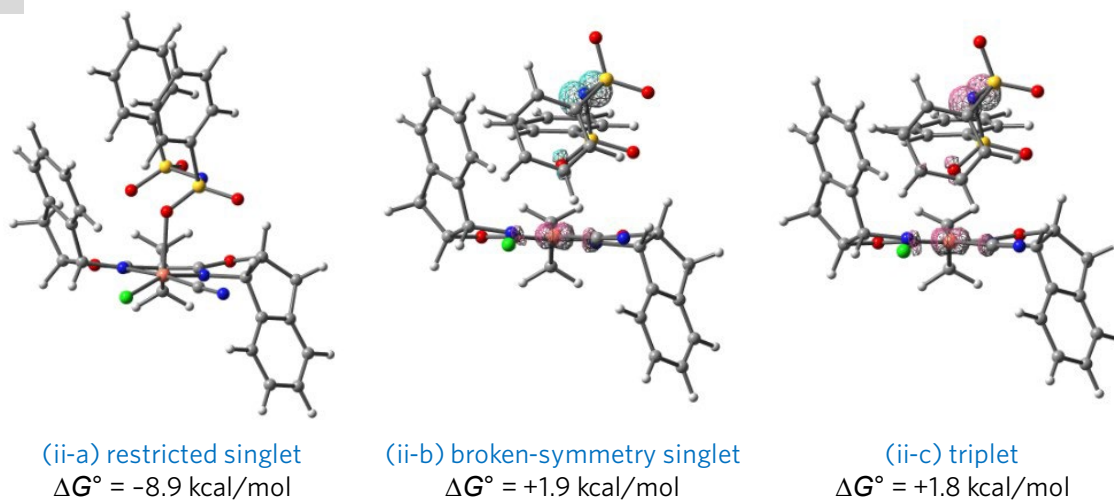

**Figure S10.** Spin-isomers of the (i)  $\kappa$ -N Cu/ $\bullet$ NSI and (ii)  $\kappa$ -O Cu/ $\bullet$ NSI species investigated in this study. The reaction free energies ( $\Delta G^\circ$ , kcal/mol) are reported by referencing the energy of the isolated  $\text{LCu}^{\text{II}}(\text{Cl})(\text{CN})$  and  $\bullet$ NSI species as the *zero* of energy. Using the M06-D3(0)/basis-II/SMD(DCM)//M06-D3(0)/basis-I level of theory at 298.15 K, both  $\kappa$ -N and  $\kappa$ -O isomers exhibited the restricted singlet solutions (i-a) and (ii-a), respectively, as the most energetically favorable conformers. The  $\alpha$ - and  $\beta$ -spins are represented by pink and cyan lobes, respectively.

## 10. Hydrogen-atom transfer (HAT) vs. proton-coupled electron transfer (PCET)

Two key variations of a hydrogen atom abstraction (HAA) process are described in Figure S11: hydrogen-atom transfer, HAT, where the electron and proton travel “together” between the same donor and acceptor sites, and concerted proton-coupled electron transfer, PCET, where the proton and electron are transferred in parallel, but they do so between different donor and acceptor sites.<sup>11</sup>

An intrinsic bond orbital's (IBO's) change along a reaction coordinate closely follows the “curly arrow”, typically used to describe bond-making and bond-breaking processes in a chemical reaction and are particularly valuable for separating HAT from PCET reactions.<sup>11, 12</sup> Accordingly, to distinguish between the operating mechanism(s) during HAA by the free  $\bullet$ NSI and the  $\kappa$ -O  $\text{Cu}^{\text{III}}$ -sulfonimide species, we have carried out IBO analysis of the C–H reaction coordinate.

Figure S12(iii–iv) shows evolution of the IBOs of the activated 2° benzylic C–H bond during HAA by free  $\bullet$ NSI. We find that the pink lobe representing the  $\alpha$ -electron of the 2° benzylic C–H bond in Figure S12(iii) evolved into a semilocalized radical on the product, while the blue-green IBO (Figure S12(iv)) representing the  $\beta$ -electron of the same C–H bond developed into an N–H bond in H–NSI. Since the electron follows the proton along the HAA reaction coordinate and transfers between the same donor/acceptor sites (Figure S11(i)), the mechanism can be described as an HAT reaction.

A similar analysis was also conducted with the  $\kappa$ -O  $\text{Cu}^{\text{III}}$ -sulfonimide initiator on the same substrate. Figure S13(iii) and Figure S14(ii) show the evolution of the  $\beta$ -IBO and  $\alpha$ -IBO of the C–H bond, respectively, and a comparison between them shows near-identical evolution along the intrinsic reaction coordinate. Considering both the initial C–H IBOs remain on the benzylic substrate along the H-coordinate, an electron must be transferred from another IBO to complete the reaction (recall it is a concerted reaction). Figure S14(iii) shows that it is an  $\alpha$ -IBO of the aryl  $\pi$ -cloud of the benzyl substrate that develops into a copper  $d_{x^2-y^2}$  orbital near the TS-geometry, indicating direct electron transfer from the substrate to the copper-center. With the transfer of the protons and electrons involving different donor and acceptor centers, this process is best described as a PCET reaction, as indicated with curly arrows in Figure S11(ii).

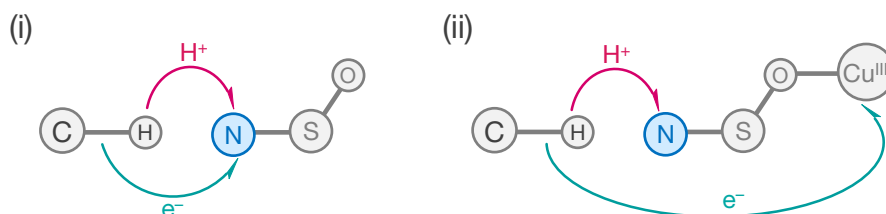

**Figure S11.** Simplified “curly arrow” description of electron ( $e^-$ ) and proton ( $H^+$ ) flow in HAT vs. PCET mediated by free  $\bullet$ NSI and  $\kappa$ -O  $\text{Cu}^{\text{III}}$ -sulfonimide species.

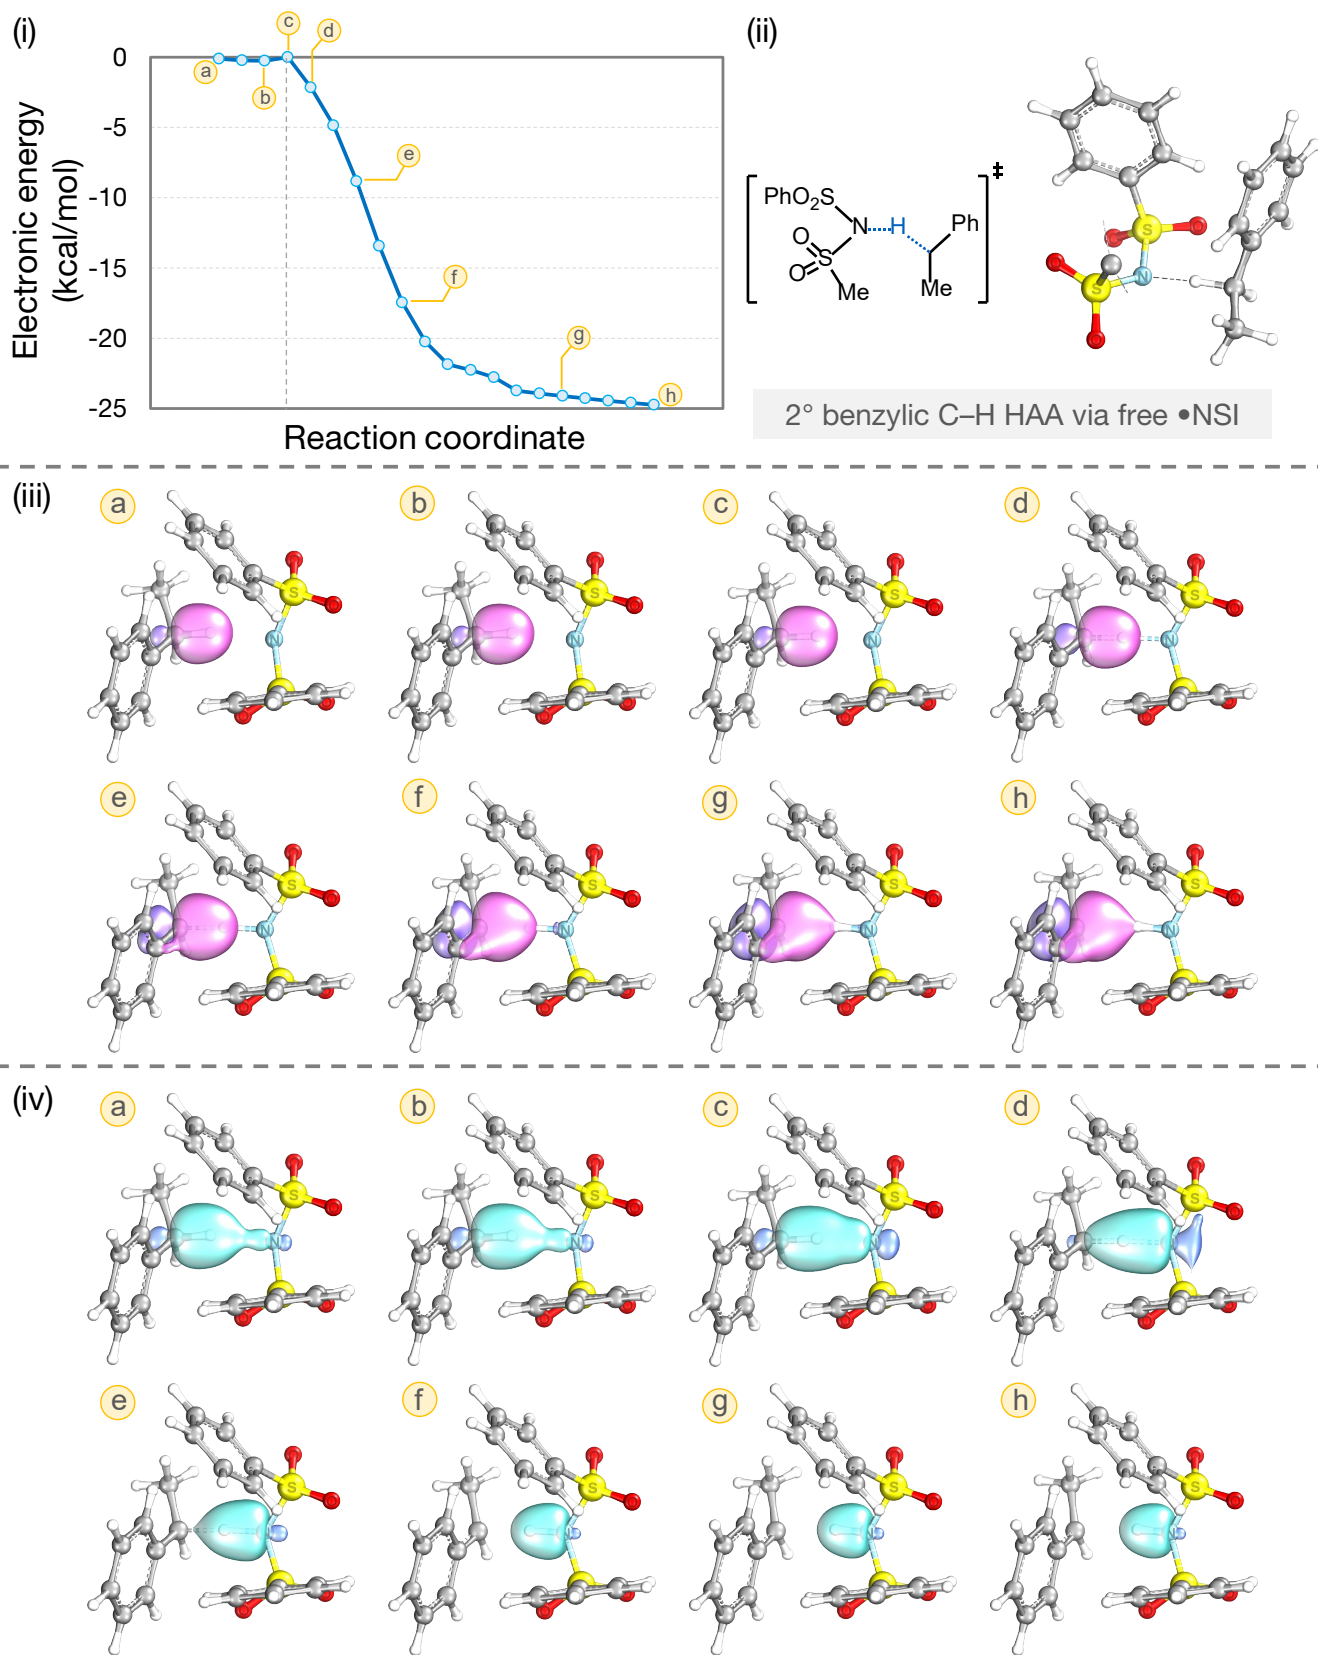

**Figure S12.** Understanding HAA with the free •NSI radical: (i) Electronic energies (kcal/mol; computed at the M06-D3(0)/basis-I level of theory) along the C–H reaction coordinate (along the potential energy surface, point *a* is “reactant-like”, *c* represents the TS, and *h* is “product-like”, (ii) depiction of the TS, (iii) IBO transformation along the C–H reaction coordinate for the  $\alpha$ -IBOs, and (iv) the  $\beta$ -IBOs.

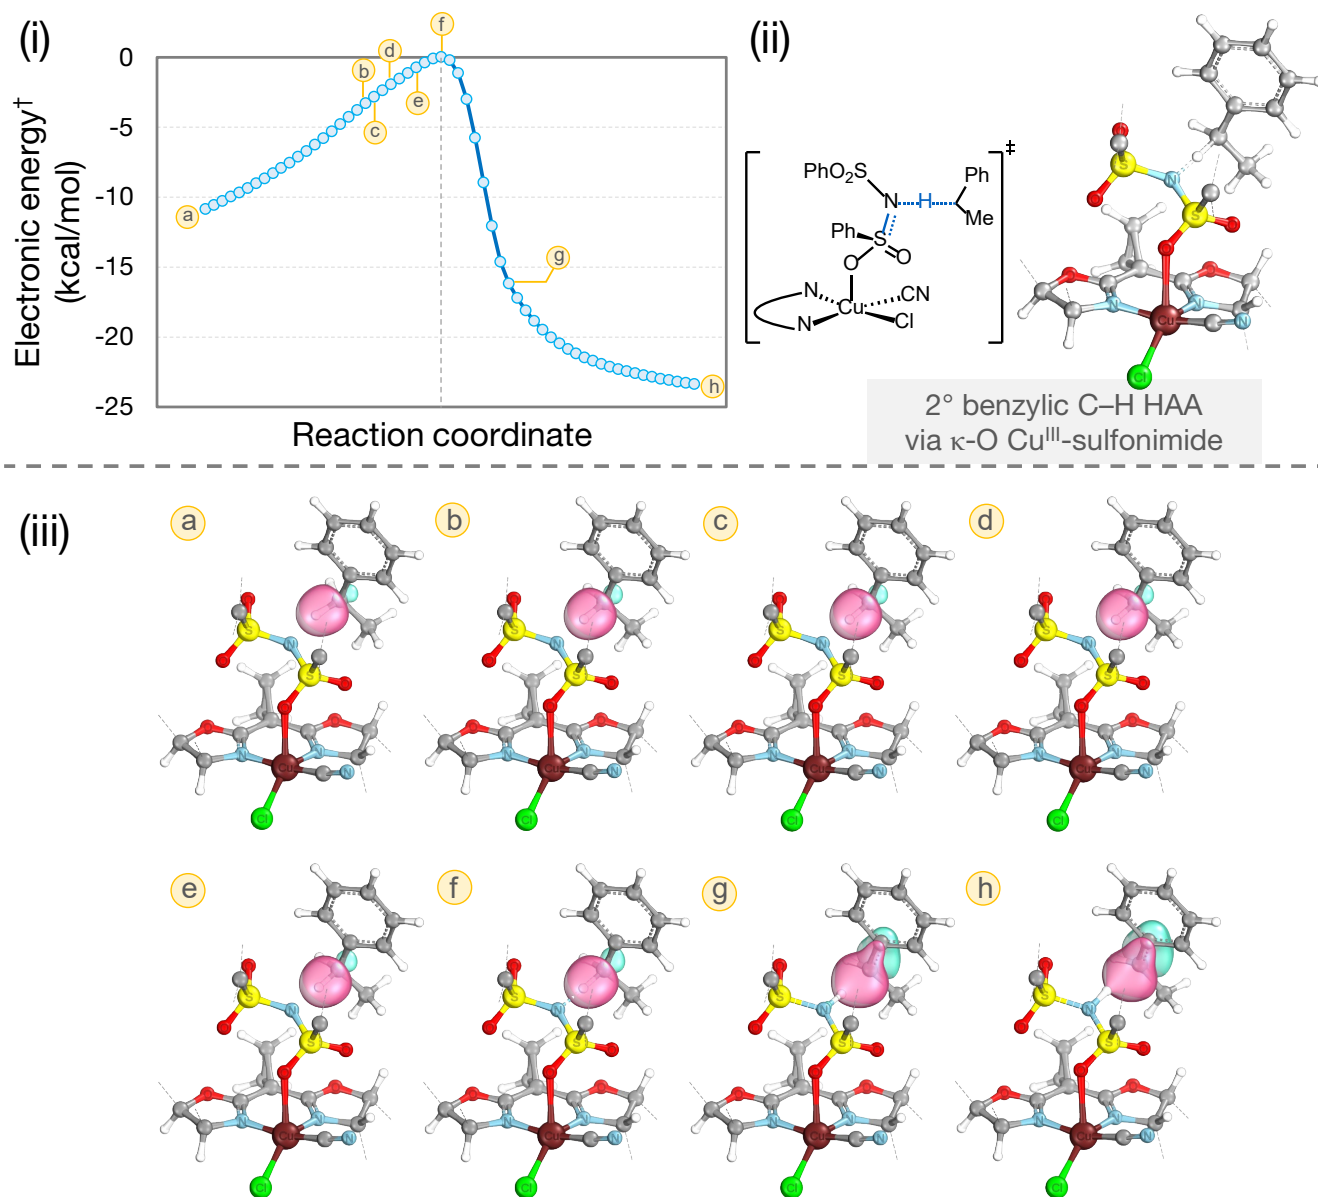

**Figure S13.** Understanding HAA with the  $\kappa$ -O Cu<sup>III</sup>-sulfonimide species: (i) Electronic energies (kcal/mol; computed at the M06-D3(0)/basis-I level of theory) along the C-H reaction coordinate (along the potential energy surface, point *a* is “reactant-like”, *f* is the TS, and *h* is “product-like”, (ii) depiction of the TS, (iii) IBO transformation along the C-H reaction coordinate for the  $\beta$ -IBOs of the C-H bond. †Note that the electronic energies reported here do not include the Yamaguchi spin-projection required for a broken symmetry singlet potential energy surface.

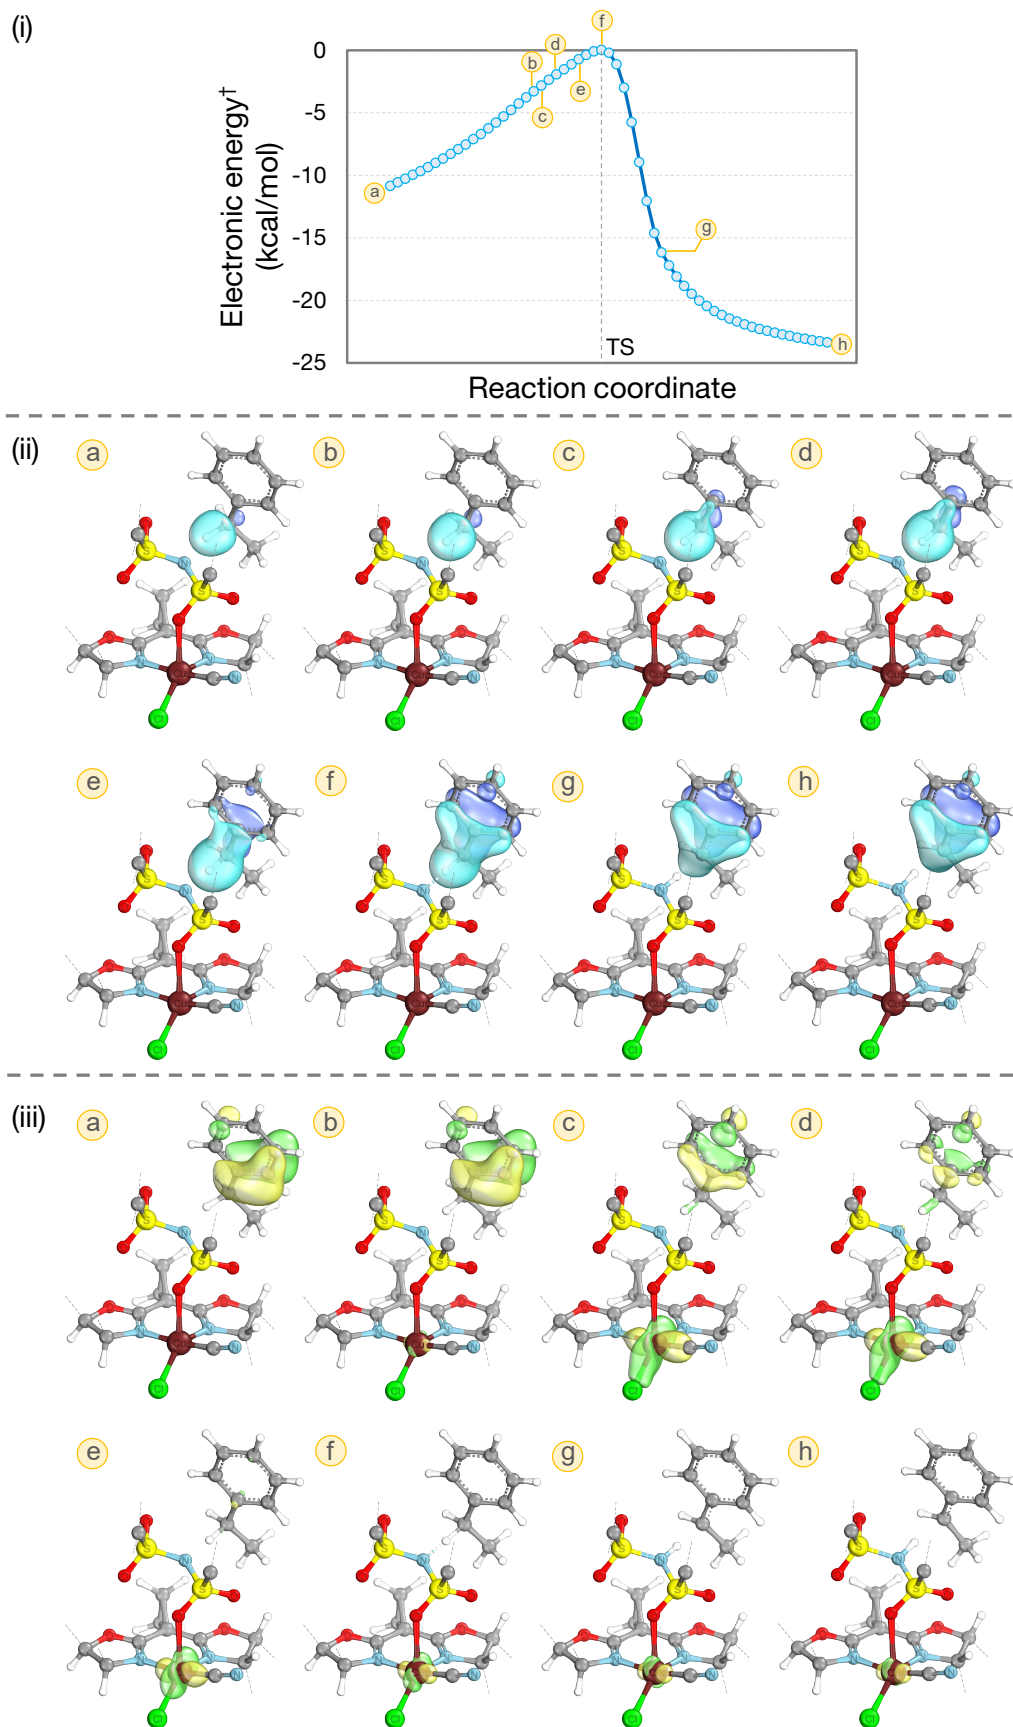

**Figure S14.** Understanding HAA with the  $\kappa$ -O  $\text{Cu}^{\text{III}}$ -sulfonimide species: (i) Electronic energies along the C–H reaction coordinate; IBO transformation along the C–H reaction coordinate for the (ii)  $\alpha$ -IBOs of the C–H bond, and the (iii)  $\alpha$ -IBO of the aryl  $\pi$ -cloud of the benzyl substrate.



## 11. Computed bond dissociation enthalpies (BDEs)

**Table S8.** Bond dissociation enthalpies (BDEs) of substrates **1–3** as well as of H–Y agents (Y = NSI, O<sup>t</sup>Bu, Cl). Reaction enthalpies (kcal/mol) are computed at M06-D3(0)/basis-II/SMD(DCM)//M06-D3(0)/basis-I level of theory at 298.15 K. (*a* = aliphatic; *b* = benzylic)

| Substrate           | Site              | BDE (kcal/mol) |
|---------------------|-------------------|----------------|
| <b>1</b>            | BDE <sub>1b</sub> | 85.2           |
|                     | BDE <sub>1a</sub> | 91.8           |
| <b>2</b>            | BDE <sub>2b</sub> | 84.4           |
|                     | BDE <sub>2a</sub> | 92.6           |
| <b>3</b>            | BDE <sub>3b</sub> | 83.5           |
|                     | BDE <sub>3a</sub> | 87.3           |
| H–NSI               |                   | 107.0          |
| H–O <sup>t</sup> Bu |                   | 103.6          |
| H–Cl                |                   | 104.0          |

## 12. Regioselectivity studies

**Table S9.** Reaction free energies ( $\Delta G^\circ$ ) for the hydrogen-atom abstraction step involving three HAA initiators described in the text. Gibbs free energies (kcal/mol) are computed at M06-D3(0)/basis-II/SMD(DCM)//M06-D3(0)/basis-I level of theory at 298.15 K. (*a* = aliphatic; *b* = benzylic)

| Substrate | $\Delta G^\circ_b$ vs. $\Delta G^\circ_a$ | $\kappa$ -O Cu <sup>III</sup> -sulfonimide | •O <sup>t</sup> Bu | •Cl   |
|-----------|-------------------------------------------|--------------------------------------------|--------------------|-------|
| <b>1</b>  | $\Delta G^\circ_{1b}$                     | -12.7                                      | -19.1              | -19.5 |
|           | $\Delta G^\circ_{1a}$                     | -6.8                                       | -13.3              | -13.7 |
| <b>2</b>  | $\Delta G^\circ_{2b}$                     | -12.9                                      | -19.3              | -19.7 |
|           | $\Delta G^\circ_{2a}$                     | -6.4                                       | -12.9              | -13.3 |
| <b>3</b>  | $\Delta G^\circ_{3b}$                     | -14.3                                      | -20.7              | -21.1 |
|           | $\Delta G^\circ_{3a}$                     | -9.1                                       | -15.5              | -15.9 |

**Table S10.** Activation free energies ( $\Delta G^\ddagger$ ) for the hydrogen-atom abstraction step involving three HAA initiators described in the text. Gibbs free energies (kcal/mol) are computed at M06-D3(0)/basis-II/SMD(DCM)//M06-D3(0)/basis-I level of theory at 298.15 K. (*a* = aliphatic; *b* = benzylic)

| Substrate | $\Delta G^\ddagger_b$ vs. $\Delta G^\ddagger_a$ | $\kappa$ -O Cu <sup>III</sup> -sulfonimide | •O <sup>t</sup> Bu | •Cl  |
|-----------|-------------------------------------------------|--------------------------------------------|--------------------|------|
| <b>1</b>  | $\Delta G^\ddagger_{1b}$                        | 10.9                                       | 10.0               | -8.0 |
|           | $\Delta G^\ddagger_{1a}$                        | 15.7                                       | 11.1               | --   |
| <b>2</b>  | $\Delta G^\ddagger_{2b}$                        | 10.1                                       | 10.6               | --   |
|           | $\Delta G^\ddagger_{2a}$                        | 15.5                                       | 11.9               | --   |
| <b>3</b>  | $\Delta G^\ddagger_{3b}$                        | 8.9                                        | 10.2               | --   |
|           | $\Delta G^\ddagger_{3a}$                        | 11.5                                       | 12.7               | --   |

### 13. Steric maps for comparing reactivity at aliphatic vs. benzylic C–H bonds

When considering the reactivity and selectivity between aliphatic and benzylic C–H bonds, the steric factors originating from the Cu/•NSI adduct are expected to play an important role. Generally, these factors are anticipated to favor reactivity at the 2° benzylic sites over the 3° aliphatic sites. To evaluate the influence of the steric profile on the reactivity, we calculated the fractional buried volume ( $\% V_{\text{Bur}}$ ).<sup>13</sup> This parameter quantitatively characterizes the steric environment within a given catalytic pocket. The  $\% V_{\text{Bur}}$  values for the relevant transition state structures involving the reactivity at the benzylic and aliphatic positions of substrate **1** with  $\kappa$ -O Cu/•NSI are depicted in **Figure S15**. The benzylic reactivity of substrate **1** with  $\kappa$ -O Cu/•NSI exhibits a slightly higher amount of ‘free’ space (approximately 10%) compared to the aliphatic case (approximately 7.6%), confirming reduced steric hindrance to the reactivity.

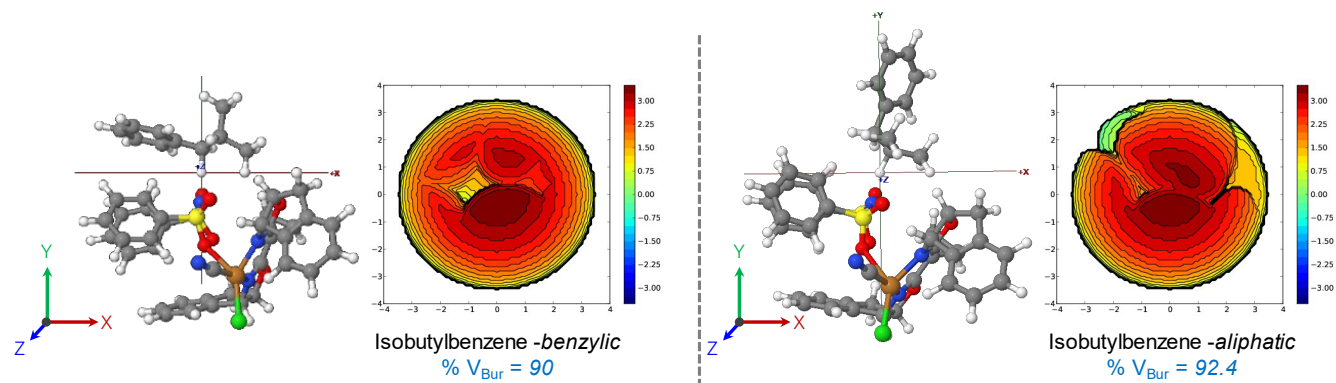

**Figure S15.** The fractional buried volume ( $\% V_{\text{Bur}}$ ), calculated by considering a 3.5 Å sphere surrounding the abstracted H atom, indicates that the benzylic reactivity of substrate **1** with  $\kappa$ -O Cu/•NSI exhibits a lower steric hindrance, as evidenced by a higher percentage of free space ( $\sim 10\%$ ) compared to the aliphatic case ( $\sim 7.6\%$ ).

### 14. Energetics for product forming pathways: Cyanation vs. azidation vs. etherification

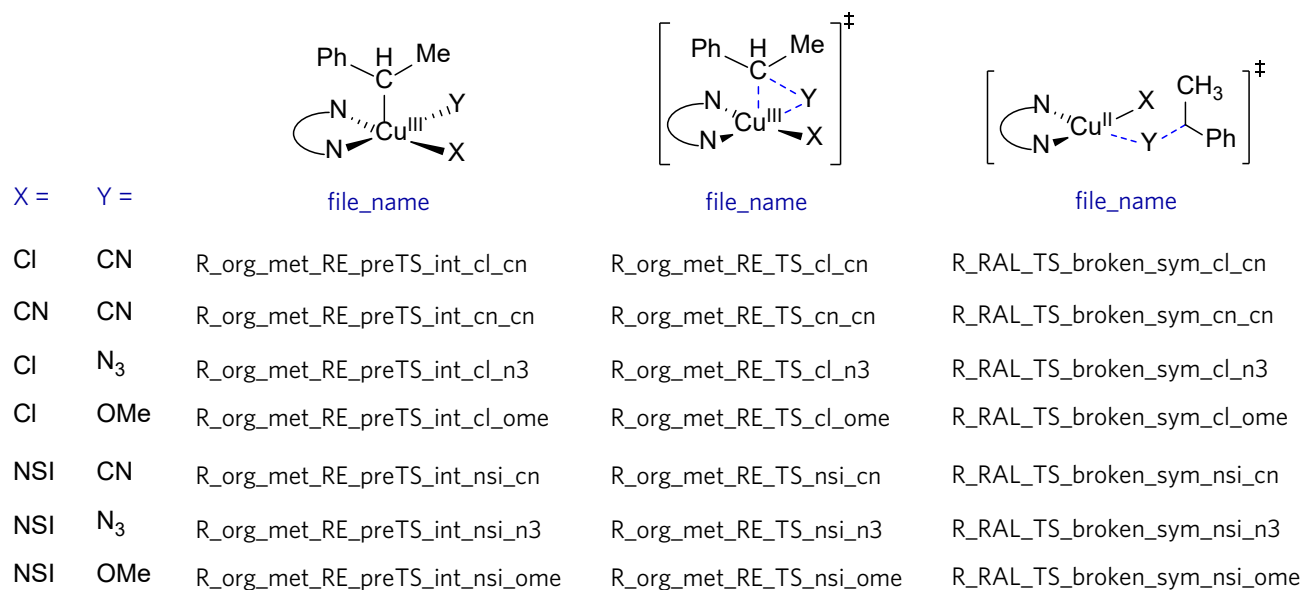

**Figure S16.** Line drawing of a generic reductive elimination (RE) transition state (TS) structure, a typical ‘formally’ LCu<sup>III</sup> intermediate that precedes the RE TS structure, and the TS describing direct radical addition at a copper-bound ligand. The corresponding energetics are shown in **Table S11**.

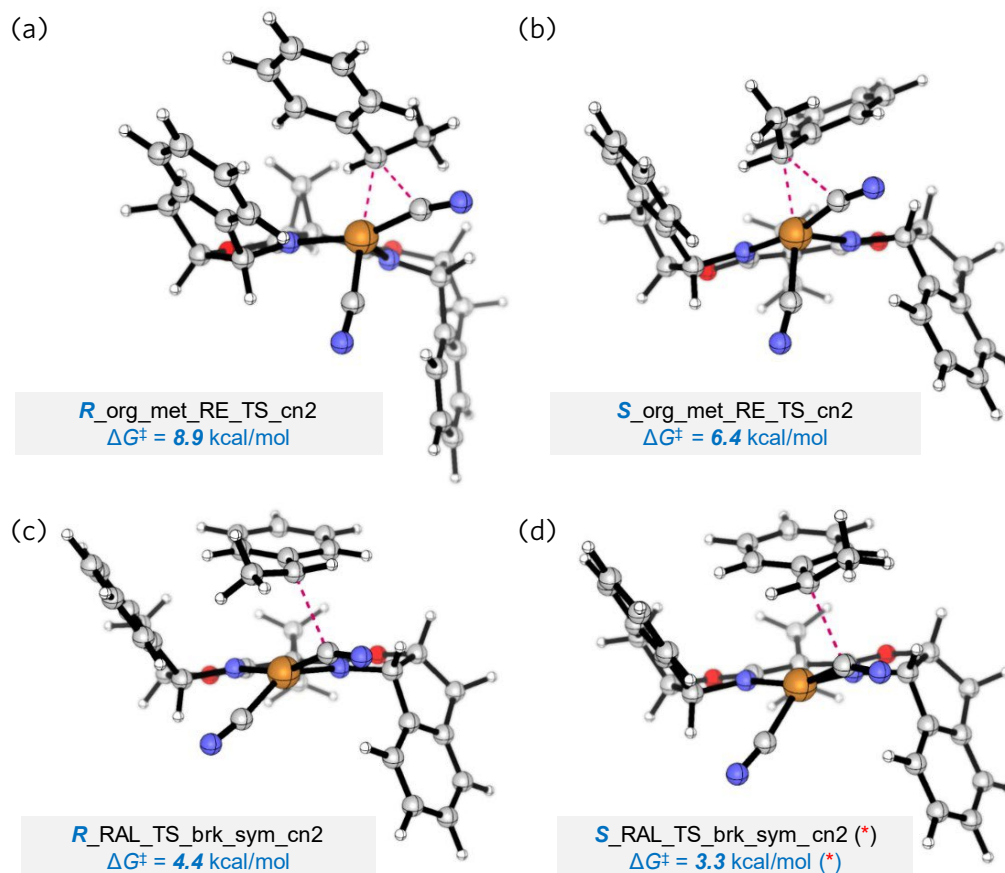

**Figure S17.** Exploring enantioselectivity during cyanation of PhCH<sub>2</sub>Me. Both reductive elimination (RE) and radical addition to ligand (RAL) favor formation of the *S*-stereoisomer, although RAL is shown to have a lower overall barrier. The activation free energies ( $\Delta G^\ddagger$ ) are reported with reference to the energy of the spin-triplet precomplex of LCu<sup>III</sup>(CN)(CN) and PhCH( $\bullet$ )Me species set as the *zero* energy point. Gibbs free energies are reported in kcal/mol and calculated using the M06-D3(0)/basis-II/SMD(DCM)//M06-D3(0)/basis-I level of theory at 298.15 K. The corresponding (absolute) energetics are shown in **Table S11**. \*Not all convergence criteria were fulfilled during optimization of this transition state structure.

**Table S11.** Electronic energies, Gibbs free energies (*G*) and thermal contribution to *G* for structures shown in **Figure S16**. Energies are reported in hartree computed at M06-D3(0)/basis-II/SMD(DCM)//M06-D3(0)/basis-I level of theory at 298.15 K.

| File/Structure name            | Electronic energy (hartree) | Thermal contribution to <i>G</i> (hartree) | Gibbs free energy ( <i>G</i> , hartree) |
|--------------------------------|-----------------------------|--------------------------------------------|-----------------------------------------|
| R_org_met_RE_preTS_int_cl_cn   | -3651.782292                | 0.474969                                   | -3651.304303                            |
| R_org_met_RE_preTS_int_cn_cn   | -3284.360129                | 0.479436                                   | -3283.877673                            |
| R_org_met_RE_preTS_int_cl_n3   | -3723.137682                | 0.47818                                    | -3722.656482                            |
| R_org_met_RE_preTS_int_cl_ome  | -3674.054901                | 0.506292                                   | -3673.545589                            |
| R_org_met_RE_preTS_int_nsi_cn  | -4806.681652                | 0.666489                                   | -4806.012143                            |
| R_org_met_RE_preTS_int_nsi_n3  | -4878.042087                | 0.668504                                   | -4877.370563                            |
| R_org_met_RE_preTS_int_nsi_ome | -4828.959756                | 0.698267                                   | -4828.258469                            |
| R_org_met_RE_TS_cl_cn          | -3651.776552                | 0.474027                                   | -3651.299505                            |



|                                 |                           |           |               |
|---------------------------------|---------------------------|-----------|---------------|
| R_org_met_RE_TS_cn_cn           | -3284.355919              | 0.479279  | -3283.87362   |
| R_org_met_RE_TS_cl_n3           | -3723.128687              | 0.475137  | -3722.65053   |
| R_org_met_RE_TS_cl_ome          | -3674.041434              | 0.50067   | -3673.537744  |
| R_org_met_RE_TS_nsi_cn          | -4806.678548              | 0.665434  | -4806.010094  |
| R_org_met_RE_TS_nsi_n3          | -4878.037236              | 0.665995  | -4877.368221  |
| R_org_met_RE_TS_nsi_ome         | -4828.949366              | 0.696407  | -4828.249939  |
| R_RAL_preTS_int_triplet_cl_cn   | -3651.785369              | 0.467903  | -3651.314446  |
| R_RAL_preTS_int_triplet_cn_cn   | -3284.364505              | 0.473745  | -3283.88774   |
| R_RAL_preTS_int_triplet_cl_n3   | -3723.150862              | 0.473734  | -3722.674108  |
| R_RAL_preTS_int_triplet_cl_ome  | -3674.068042              | 0.5018    | -3673.563222  |
| R_RAL_preTS_int_triplet_nsi_cn  | -4806.681073              | 0.659247  | -4806.018806  |
| R_RAL_preTS_int_triplet_nsi_n3  | -4878.047004              | 0.664675  | -4877.379309  |
| R_RAL_preTS_int_triplet_nsi_ome | -4828.963295              | 0.693039  | -4828.267236  |
| R_RAL_TS_brk_sym_cl_cn          | -3651.781326 <sup>†</sup> | 0.471427  | -3651.306879  |
| R_RAL_TS_brk_sym_cn_cn          | -3284.360997 <sup>†</sup> | 0.477254  | -3283.880723  |
| R_RAL_TS_brk_sym_cl_n3_N-alph   | -3723.146215 <sup>†</sup> | 0.473436  | -3722.669759  |
| R_RAL_TS_brk_sym_cl_n3_N-gam    | -3723.139703 <sup>†</sup> | 0.474854  | -3722.661829  |
| R_RAL_TS_brk_sym_cl_ome         | -3674.067713 <sup>†</sup> | 0.502705  | -3673.561988  |
| R_RAL_TS_brk_sym_nsi_cn*        | -4806.678555 <sup>†</sup> | 0.661503  | -4806.014032  |
| R_RAL_TS_brk_sym_nsi_n3_N-alph  | -4878.044883 <sup>†</sup> | 0.664031  | -4877.377832  |
| R_RAL_TS_brk_sym_nsi_n3_N-gam   | -4878.041901 <sup>†</sup> | 0.66542   | -4877.373461  |
| R_RAL_TS_brk_sym_nsi_ome        | -4828.966864 <sup>†</sup> | 0.694022  | -4828.269822  |
| cuii_cn2_ph_CHMeRad_INT_triplet | -3284.364505              | 0.473745  | -3283.88774   |
| R_org_met_RE_TS_cn_cn           | -3284.355923              | 0.479278  | -3283.873625  |
| S_org_met_RE_TS_cn_cn           | -3284.360922              | 0.480353  | -3283.877549  |
| R_RAL_TS_cn_cn_brk_sym          | -3284.360996 <sup>†</sup> | 0.4772540 | -3283.880723  |
| S_RAL_TS_cn_cn_brk_sym*         | -3284.362045 <sup>†</sup> | 0.4765550 | -3283.8824701 |

<sup>†</sup>Electronic energies for these broken-symmetry singlet TSs are made spin contamination free following the Yamaguchi scheme. \*Not all convergence criterions were met during optimization of this structure.

## 15. Comparing Cu/NFSI reactivity with analogous methods yielding benzylic cation

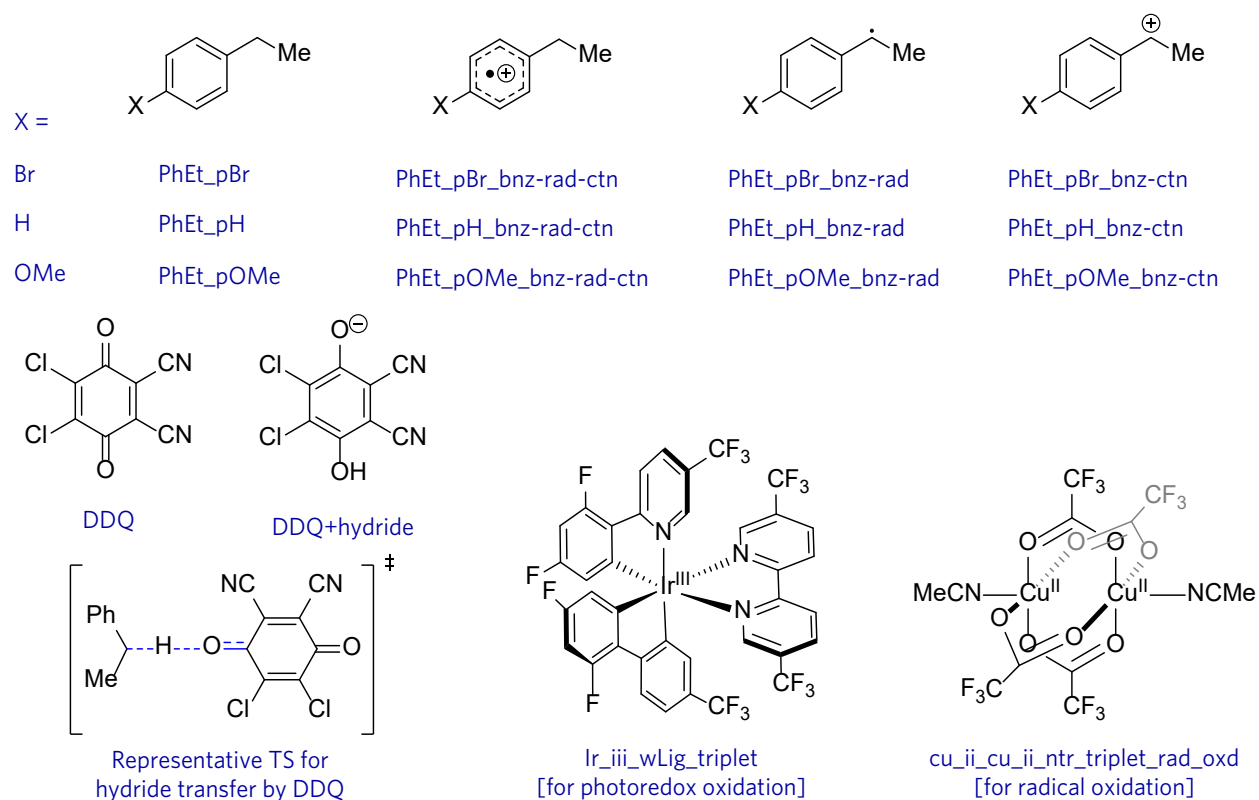

**Figure S18.** Line drawing of the structures, the energetics of which are shown in **Table S12**.

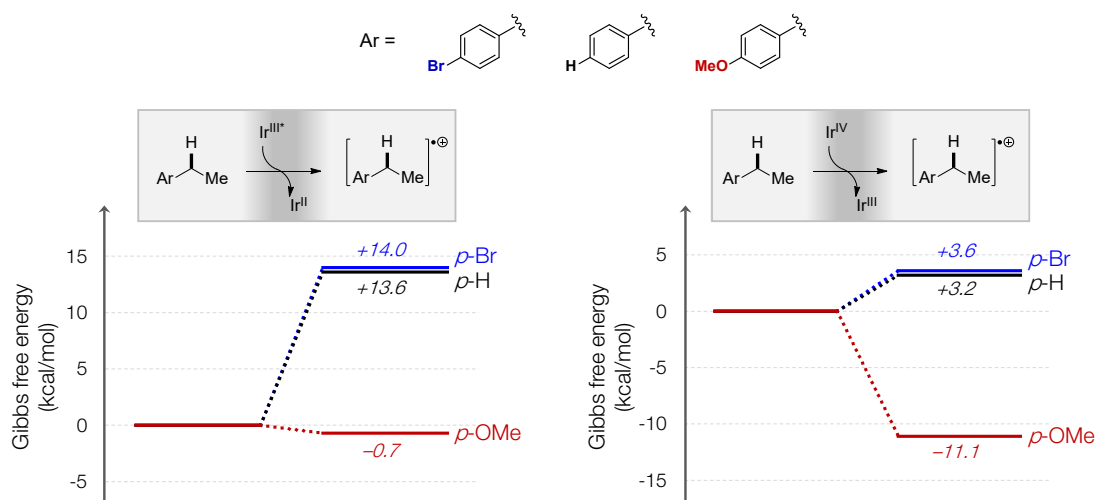

**Figure S19.** Comparing radical cation generation from benzylic C–H substrate using Ir<sup>III\*</sup> vs Ir<sup>IV</sup> catalysts, the raw energetics of which are shown in **Table S12**.

**Table S12.** Electronic energies, Gibbs free energies (*G*) and thermal contribution to *G* for structures shown in **Figure S18** and **Figure S19**. Energies are reported in hartree computed at M06-D3(0)/basis-II/SMD(DCM)//M06-D3(0)/basis-I level of theory at 298.15 K.

| File/Structure name             | Electronic energy (hartree) | Thermal contribution to <i>G</i> (hartree) | Gibbs free energy ( <i>G</i> , hartree) |
|---------------------------------|-----------------------------|--------------------------------------------|-----------------------------------------|
| PhEt_pBr                        | -2884.214511                | 0.110159                                   | -2884.101332                            |
| PhEt_pH                         | -310.7432788                | 0.123488                                   | -310.6167708                            |
| PhEt_pOMe                       | -425.252048                 | 0.152468                                   | -425.09656                              |
| PhEt_pBr_bnz-rad-ctn            | -2883.976883                | 0.108157                                   | -2883.865706                            |
| PhEt_pH_bnz-rad-ctn             | -310.5049956                | 0.120144                                   | -310.3818316                            |
| PhEt_pOMe_bnz-rad-ctn           | -425.0386741                | 0.151214                                   | -424.8844401                            |
| PhEt_pBr_bnz-rad                | -2883.570219                | 0.096                                      | -2883.471199                            |
| PhEt_pH_bnz-rad                 | -310.0983805                | 0.108854                                   | -309.9865065                            |
| PhEt_pOMe_bnz-rad               | -424.6078587                | 0.137652                                   | -424.4671867                            |
| PhEt_pBr_bnz-ctn                | -2883.395874                | 0.0991                                     | -2883.293754                            |
| PhEt_pH_bnz-ctn                 | -309.928007                 | 0.112355                                   | -309.812632                             |
| PhEt_pOMe_bnz-ctn               | -424.4532553                | 0.142345                                   | -424.3078903                            |
| cu_iii_cl_cn_nsi_κ-SO           | -4956.733764                | 0.528631                                   | -4956.202113                            |
| cu_ii_cl_cn_wLig                | -3341.664771                | 0.335583                                   | -3341.326168                            |
| nsi_h                           | -1615.703549                | 0.172178                                   | -1615.528351                            |
| PhEt_pBr_TS_haa_by_cu_iii_κ-SO  | -7840.941955 <sup>†</sup>   | 0.655315                                   | -7840.28362                             |
| PhEt_pH_TS_haa_by_cu_iii_κ-SO   | -5267.470967 <sup>†</sup>   | 0.66779                                    | -5266.800157                            |
| PhEt_pOMe_TS_haa_by_cu_iii_κ-SO | -5381.993554 <sup>†</sup>   | 0.700134                                   | -5381.2904                              |
| DDQ                             | -1484.983215                | 0.023427                                   | -1484.956768                            |
| DDQ+hydride                     | -1485.774668                | 0.035351                                   | -1485.736297                            |
| PhEt_pBr_TS_hydride_shift_ddq   | -4369.175182                | 0.154686                                   | -4369.017476                            |
| PhEt_pH_TS_hydride_shift_ddq    | -1795.705413                | 0.167581                                   | -1795.534812                            |
| PhEt_pOMe_TS_hydride_shift_ddq  | -1910.223696                | 0.196804                                   | -1910.023872                            |
| Ir_iv_wLig                      | -3301.788396                | 0.388244                                   | -3301.397132                            |
| Ir_iii_wLig_triplet             | -3301.937626                | 0.385651                                   | -3301.548955                            |
| Ir_iii_wLig_singlet             | -3302.01964                 | 0.389628                                   | -3301.626992                            |
| Ir_ii_wLig                      | -3302.151565                | 0.386353                                   | -3301.762192                            |
| cu_ii_cu_ii_ntr_singlet_rad_oxd | -5651.464383                | 0.134163                                   | -5651.3272                              |
| cu_ii_cu_ii_ntr_triplet_rad_oxd | -5651.512982                | 0.135447                                   | -5651.374515                            |
| cu_ii_cu_i_ann_doublet_rad_oxd  | -5651.679733                | 0.136059                                   | -5651.540654                            |
| K2HPO4                          | -1842.986951                | -0.007497                                  | -1842.991428                            |
| K2HPO4+(H+)                     | -1843.458761                | 0.003759                                   | -1843.451982                            |

<sup>†</sup>Electronic energies for these broken-symmetry singlet TSs are made spin contamination free following the Yamaguchi scheme.

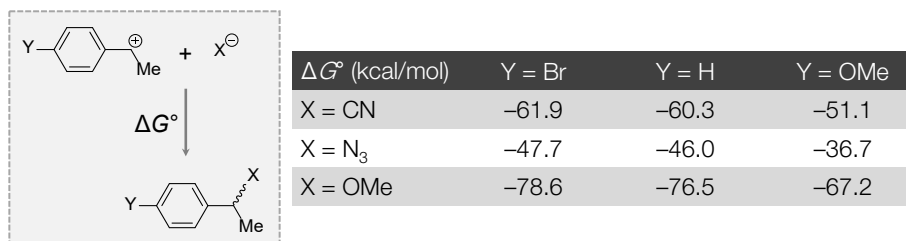

**Figure S20.** Schematic for benzylic carbocation trapping by a nucleophile. Reaction free energies ( $\Delta G^\circ$ , kcal/mol) for trapping a benzylic carbocation by different nucleophiles ( $X = \text{CN}, \text{N}_3, \text{OMe}$ ) and with various para substituents on the benzyl cation substrate ( $Y = \text{Br}, \text{H}, \text{OMe}$ ) were calculated at 298.15 K using the M06-D3(0)/basis-II/SMD(DCM)//M06-D3(0)/basis-I level of theory.

**Table S13.** Electronic energies, Gibbs free energies ( $G$ ) and thermal contribution to  $G$  for structures shown in **Figure S20**. Energies are reported in hartree computed at M06-D3(0)/basis-II/SMD(DCM)//M06-D3(0)/basis-I level of theory at 298.15 K.

| File/Structure name               | Electronic energy (hartree) | Thermal contribution to $G$ (hartree) | Gibbs free energy ( $G$ , hartree) |
|-----------------------------------|-----------------------------|---------------------------------------|------------------------------------|
| PhEt_pBr_bnz-ctn                  | -2883.395874                | 0.099100                              | -2883.293754                       |
| PhEt_pH_bnz-ctn                   | -309.928007                 | 0.112355                              | -309.812632                        |
| PhEt_pOMe_bnz-ctn                 | -424.453255                 | 0.142345                              | -424.307890                        |
| cyanide_anion                     | -92.9225879                 | -0.014065                             | -92.9336329                        |
| azide_anion                       | -164.2910419                | -0.005229                             | -164.2932509                       |
| methoxide_anion                   | -115.1754287                | 0.014324                              | -115.1580847                       |
| Ar_CH(CN)_Me (p-Br)               | -2976.435888                | 0.106783                              | -2976.3260858                      |
| Ar_CH(CN)_Me (p-H)                | -402.9654835                | 0.120144                              | -402.8423195                       |
| Ar_CH(CN)_Me (p-OMe)              | -517.4750910                | 0.149090                              | -517.3229810                       |
| Ar_CH(N <sub>3</sub> )_Me (p-Br)  | -3047.776247                | 0.110205                              | -3047.6630222                      |
| Ar_CH(N <sub>3</sub> )_Me (p-H)   | -474.3055700                | 0.123342                              | -474.1792080                       |
| Ar_CH(N <sub>3</sub> )_Me (p-OMe) | -588.8154078                | 0.152829                              | -588.6595588                       |
| Ar_CH(OMe)_Me (p-Br)              | -2998.719549                | 0.139483                              | -2998.5770462                      |
| Ar_CH(OMe)_Me (p-H)               | -425.2485005                | 0.152817                              | -425.0926635                       |
| Ar_CH(OMe)_Me (p-OMe)             | -539.7578943                | 0.181775                              | -539.5730993                       |

## 16. References

- (1) Hu, H.; Chen, S.-J.; Mandal, M.; Pratik, S. M.; Buss, J. A.; Krska, S. W.; Cramer, C. J.; Stahl, S. S. Copper-catalysed benzylic C–H coupling with alcohols via radical relay enabled by redox buffering. *Nat. Catal.* **2020**, *3*, 358–367. <https://doi.org/10.1038/s41929-020-0425-1>.
- (2) Lopez, M. A.; Buss, J. A.; Stahl, S. S. Cu-Catalyzed Site-Selective Benzylic Chlorination Enabling Net C–H Coupling with Oxidatively Sensitive Nucleophiles. *Org. Lett.* **2022**, *24*, 597–601. <https://doi.org/10.1021/acs.orglett.1c04038>.
- (3) Ozawa, J.; Kanai, M. Silver-Catalyzed C(sp<sup>3</sup>)–H Chlorination. *Org. Lett.* **2017**, *19*, 1430–1433. <https://doi.org/10.1021/acs.orglett.7b00367>.
- (4) Bruker-AXS (2016). *APEX3*. Version 2016.5-0. Madison, Wisconsin, USA.
- (5) Krause, L.; Herbst-Irmer, R.; Sheldrick, G. M.; Stalke, D. Comparison of Silver and Molybdenum Microfocus X-Ray Sources for Single-Crystal Structure Determination. *J. Appl. Cryst.* **2015**, *48*, 3–10. <https://doi.org/10.1107/S1600576714022985>.
- (6) (a) Sheldrick, G. M. (2013b). *XPREP*. Version 2013/1. Georg-August-Universität Göttingen, Göttingen, Germany. (b) Sheldrick, G. M. (2013a). The *SHELX* homepage, <https://shelx.uni-goettingen.de/> (accessed on Jan 03, 2023).
- (7) (a) Sheldrick, G. SHELXT - Integrated Space-Group and Crystal-Structure Determination. *Acta Crystallogr. Sect. A* **2015**, *71*, 3–8. <https://doi.org/10.1107/S2053273314026370> (b) Sheldrick, G. Crystal Structure Refinement with SHELXL. *Acta Crystallogr. Sect. C* **2015**, *71*, 3–8. <https://doi.org/10.1107/S2053229614024218>.
- (8) Dolomanov, O. V.; Bourhis, L. J.; Gildea, R. J.; Howard, J. A. K.; Puschmann, H. OLEX2: A Complete Structure Solution, Refinement and Analysis Program. *J. Appl. Crystallogr.* **2009**, *42*, 339–341. <https://doi.org/10.1107/S0021889808042726>.
- (9) Guzei, I. A. (2007–2013). Programs *Gn*. University of Wisconsin-Madison, Madison, Wisconsin, USA.
- (10) Spek, A. PLATON SQUEEZE: A Tool for the Calculation of the Disordered Solvent Contribution to the Calculated Structure Factors. *Acta Crystallogr. Sect. C* **2015**, *71*, 9–18. <https://doi.org/10.1107/S2053229614024929>.
- (11) (a) Mandal, M.; Elwell, C. E.; Bouchey, C. J.; Zerk, T. J.; Tolman, W. B.; Cramer, C. J. Mechanisms for Hydrogen-Atom Abstraction by Mononuclear Copper(III) Cores: Hydrogen-Atom Transfer or Concerted Proton-Coupled Electron Transfer? *J. Am. Chem. Soc.* **2019**, *141*, 17236–17244. <https://doi.org/10.1021/jacs.9b08109>. (b) Elwell, C. E.; Mandal, M.; Bouchey, C. J.; Que, L.; Cramer, C. J.; Tolman, W. B. Carboxylate Structural Effects on the Properties and Proton-Coupled Electron Transfer Reactivity of [CuO<sub>2</sub>CR]<sup>2+</sup> Cores. *Inorg. Chem.* **2019**, *58*, 15872–15879. <https://doi.org/10.1021/acs.inorgchem.9b02293>. (c) Mandal, M.; Cramer, C. J.; Truhlar, D. G.; Sauer, J.; Gagliardi, L. Structure and Reactivity of Single-Site Vanadium Catalysts Supported on Metal–Organic Frameworks. *ACS Catal.* **2020**, *10*, 10051–10059. <https://doi.org/10.1021/acscatal.0c02300>.
- (12) Klein, J. E. M. N.; Knizia, G. cPCET versus HAT: A Direct Theoretical Method for Distinguishing X–H Bond-Activation Mechanisms. *Angew. Chem. Int. Ed.* **2018**, *57*, 11913–11917. <https://doi.org/10.1002/anie.201805511>.
- (13) (a) Falivene, L.; Cao, Z.; Petta, A.; Serra, L.; Poater, A.; Oliva, R.; Scarano, V.; Cavallo, L. Towards the Online Computer-Aided Design of Catalytic Pockets. *Nat. Chem.* **2019**, *11*, 872–879. <https://doi.org/10.1038/s41557-019-0319-5> (b) Falivene, L.; Credendino, R.; Poater, A.; Petta, A.; Serra, L.; Oliva, R.; Scarano, V.; Cavallo, L. SambVca 2. A Web Tool for Analyzing Catalytic Pockets with Topographic Steric Maps. *Organometallics* **2016**, *35*, 2286–2293. DOI: 10.1021/acs.organomet.6b00371 (c) Macaranas, J. A.; Luke, A. M.; Mandal, M.; Neisen, B. D.; Marell, D. J.; Cramer, C. J.; Tolman, W. B. Sterically Induced Ligand Framework Distortion Effects on Catalytic Cyclic Ester Polymerizations. *Inorg. Chem.* **2018**, *57*, 3451–3457. <https://doi.org/10.1021/acs.inorgchem.8b00250>.
